# Supplementary material
Source: PubMed Central journal article supplement (PMC5551422)
Supplement: NIHMS886687-supplement.pdf [file NIHMS886687-supplement.pdf]

## Subcellular localization of Na/K-ATPase isoforms in ventricular myocytes

Garrick K. Yuen,\* Samuel Galice\* and Donald M. Bers

*Department of Pharmacology, University of California Davis, Davis, CA 95616, USA*

\*These authors contributed equally to this manuscript

### Corresponding Author:

Donald M. Bers, PhD  
Department of Pharmacology  
University of California, Davis  
451 Health Sciences Drive  
Davis, CA 95616  
Phone: (530) 752-6517  
Fax: (530) 752-7710  
Email: [dmbers@ucdavis.edu](mailto:dmbers@ucdavis.edu)

## ABSTRACT

The sodium/potassium ATPase (NKA) is essential for establishing the normal intracellular  $[Na^+]$  and  $[K^+]$  and transmembrane gradients that are essential for many cellular functions, including cardiac electrophysiology and contractility. Different NKA isoforms exhibit differential expression levels, cellular localization, and function in different tissues and species. Prior work has indicated that the NKA- $\alpha 1$  isoform is quantitatively predominant in cardiac myocytes, but that the  $\alpha 2$  isoform is preferentially concentrated in the transverse tubules (TT), possibly at junctions with the sarcoplasmic reticulum (SR) where  $\alpha 2$  may preferentially modulate cardiac contractility. Here we measured subcellular localization of NKA- $\alpha 1$  and  $\alpha 2$  using super-resolution microscopy (STED and STORM) and isoform-selective antibodies in mouse ventricular myocytes. We confirm the preferential localization of NKA- $\alpha 2$  in TT vs. surface sarcolemma, but also show that  $\alpha 2$  is relatively excluded from longitudinal TT elements. In contrast NKA- $\alpha 1$  is relatively uniformly expressed in all three sarcolemmal regions. We also tested the hypothesis that NKA- $\alpha 2$  (vs.  $\alpha 1$ ) is preferentially concentrated at SR junctional sites near ryanodine receptors (RyR2). The results refute this hypothesis, in that NKA- $\alpha 1$  and  $\alpha 2$  were equally close to RyR2 at the TT, with no preferential NKA isoform localization near RyR2. We conclude that in contrast to relatively uniform NKA- $\alpha 1$  distribution, NKA- $\alpha 2$  is preferentially concentrated in the truly transverse (and not longitudinal) TT elements. However, NKA- $\alpha 2$  does not preferentially cluster at RyR2 junctions, so the TT NKA- $\alpha 2$  concentration may suffice for preferential effects of NKA- $\alpha 2$  inhibition on cardiac contractility.

## INTRODUCTION

The sodium/potassium ATPase (NKA) is the primary sodium extrusion pathway in cardiac myocytes and plays a critical role in cardiac contractility. NKA, a member of the P-type ATPase family, actively transports 3  $Na^+$  ions out of the cell in exchange for 2  $K^+$  ions for each molecule of ATP hydrolyzed. In adult cardiac myocytes, the catalytic  $\alpha$  subunit of NKA is present in the  $\alpha 1$ ,  $\alpha 2$ ,  $\alpha 3$  isoforms [1]. These isoforms however differ in expression level, tissue expression, sensitivity to cardiac glycosides, and voltage dependence.[2-5] The  $\alpha 1$  isoform is ubiquitously expressed in all tissue types, is present in cardiac tissue in all species, and is the predominant NKA isoform in cardiac tissue [2, 3]. In human left ventricle,  $\alpha 1$  comprises of 62.5% of total NKA

mRNA, while  $\alpha 2$  and  $\alpha 3$  are expressed at 15% and 22.5%, respectively [6]. In rat and mouse left ventricle, where only  $\alpha 1$  and  $\alpha 2$  are expressed,  $\alpha 1$  comprises of 75% and 88% of total NKA protein in rat and mouse, respectively and similarly 71-89% of total NKA pump current [7-11].

Myocyte detubulation studies demonstrated major differences in NKA isoform distribution in cardiac myocytes. NKA- $\alpha 1$  is roughly uniformly distributed throughout the sarcolemma, while  $\alpha 2$  is highly concentrated in the transverse tubules (TTs) [9-12]. These studies found that NKA- $\alpha 2$  density is 4 to 6 times higher in TTs compared to surface sarcolemma (SSL). Although  $\alpha 2$  is concentrated in the TT, there is at least as much NKA- $\alpha 1$  in the TT system (>55% of NKA in the TTs is  $\alpha 1$ ). At the SSL,  $\alpha 1$  is the dominant isoforms with 85-95% of the total NKA being  $\alpha 1$ . [9-11]

Given the differences in isoform expression and localization, one could view  $\alpha 1$  as the main isoform responsible for ion homeostasis, while  $\alpha 2$  might be involved in cardiac contractility, as in skeletal muscle cells. Skeletal muscle TTs (that are highly specialized to control  $\text{Ca}^{2+}$  release) contain almost exclusively the  $\alpha 2$  isoform, and it is well established that  $\alpha 2$ , and not  $\alpha 1$ , is responsible for modulating contractility [13-15]. In quiescent cells,  $\alpha 2$  functions below its maximal pump rate because of its voltage dependence, so that it is more active when the cell is depolarized [13, 16, 17]. Conversely, NKA- $\alpha 1$  is highly expressed at the SSL, its pump activity is not appreciably voltage dependent, and is responsible for regulating ion homeostasis.

Like in skeletal muscle, cardiac  $\alpha 2$  function and inhibition has been shown to preferentially modulate contractility [8, 18, 19]. The 500-fold higher ouabain affinity for NKA- $\alpha 2$  vs.  $\alpha 1$  in mouse (and rat), along with genetically altered mice (in which these affinities are reversed), has allowed direct functional comparisons of  $\alpha 1$  vs.  $\alpha 2$  inhibition effects on cardiac myocyte contractility [18]. Despa *et al.* [18] showed that blocking nearly all NKA- $\alpha 2$  (20% of total NKA) significantly enhanced contractility, whereas selective partial inhibition of  $\alpha 1$  (again 20% of total NKA) did not, despite producing the same measured change in  $[\text{Na}^+]_i$  in both cases. Similarly, selective NKA- $\alpha 2$  inhibition in rat ventricular myocytes increased contractility by 40%, without detectable rise in  $[\text{Na}^+]_i$  [11]. Both NKA isoforms (especially  $\alpha 2$ ) and the  $\text{Na}^+/\text{Ca}^{2+}$  exchanger (NCX) are concentrated in TTs and may interact, such that local NCX could facilitate the impact of local  $[\text{Na}^+]_i$  on  $\text{Ca}^{2+}$  transients and contractility [8, 12, 20-23].

If both  $\alpha 1$  and  $\alpha 2$  are in TTs at comparable levels, why does  $\alpha 2$  inhibition more strongly influence contractility? One attractive hypothesis is that local distributions of  $\alpha 1$  and  $\alpha 2$  differ, with NKA- $\alpha 2$  preferentially located at junctional clefts with the sarcoplasmic reticulum (SR), near ryanodine receptors (RyR2) that control SR  $\text{Ca}^{2+}$  release. Roughly 40% of the T-tubules in rat and mice are in SR junctional clefts, whereas only 6-8% of the SSL is in such junctions. [24, 25] Selective localization of  $\alpha 2$  at such junctional clefts would explain the 4-6-fold higher TT vs. SSL localization of NKA- $\alpha 2$ , and could create a local NKA-NCX-RyR nanodomain that could influence local  $[\text{Na}^+]_i$  and  $[\text{Ca}^{2+}]_i$  and contractility. There is precedent for the selective localization of  $\alpha 2$  vs.  $\alpha 1$  at plasma membrane junctions with the SR or ER in other cell types, [26-28] but definitive data in ventricular myocytes is lacking.

In this study, we employ super-resolution microscopy to characterize the distribution and localization patterns of  $\alpha 1$  and  $\alpha 2$  in mouse ventricular myocytes, overcoming limitations of prior immunofluorescence studies. Using three-dimensional STED microscopy, we found the expected TT concentration of NKA- $\alpha 2$  vs. SSL, but  $\alpha 2$  is nearly absent in longitudinal components of the TT network. In contrast NKA- $\alpha 1$  was present in all sarcolemmal domains, including longitudinal ramifications of the TTs. We also used higher resolution STORM imaging to identify isoform distribution differences specifically at the TTs. We found that, contrary to our

above hypothesis,  $\alpha 2$  is not preferentially concentrated (vs.  $\alpha 1$ ) at junctional SR sites where RyR2 is localized.

## METHODS

### Cell Preparation

Cardiac ventricular myocytes were isolated from Black 6 mice hearts using the Langendorff perfusion technique. All animal procedures were approved by the University of California, Davis Animal Research and use Committee in accordance with the NIH Guide for Care and Use of Laboratory Animals.

Mice were deeply anesthetized with 3-5% isoflurane. Hearts were excised and mounted on a gravity-driven Langendorff perfusion apparatus. Perfusion solution with MEM (135 mM NaCl, 4.7 mM KCl, 0.6 mM  $\text{KH}_2\text{PO}_4$ , 0.6 mM  $\text{Na}_2\text{HPO}_4$ , 1.2 mM  $\text{MgSO}_4$ , 20 mM HEPES, 30 mM Taurine), 6 mM glucose, and 6mM butanedione monoxime (BDM) and was oxygenated and perfused through the heart. Digestion solution (MEM, 12.5  $\mu\text{M}$  free  $[\text{Ca}^{2+}]$ , 6 mM BDM, 50  $\mu\text{g}/\text{ml}$  Liberase TM (Sigma)) was perfused through the heart for 10 min. Ventricular cardiac tissue chunks were broken up by trituration in stopping solution (MEM, 12.5  $\mu\text{M}$   $\text{Ca}^{2+}$ , 6 mM BDM, 1% FBS) and washed several times to disperse individual myocytes in a final solution of 0.8 mM  $\text{Ca}^{2+}$  Tyrode's solution (140 mM NaCl, 4 mM KCl, 1 mM  $\text{MgCl}_2$ , 5 mM HEPES, 10 mM glucose).

### Immunocytochemistry

Isolated ventricular myocytes were fixed using 4% paraformaldehyde in PBS for 10 min. Cells were washed five times with PBS and permeabilized with 0.2% triton-X-100 for 10 min. Cells were washed five more times with PBS and blocked with 5% bovine serum and 5% goat serum for 1 hr. Cells were then incubated overnight at 4°C in primary antibody. Primary antibodies anti-RyR2 (ThermoFisher, mouse monoclonal IgG1, C3-33), anti-NKA  $\alpha$ -1 (Millipore, mouse monoclonal IgG1k, C464.6), anti-NKA  $\alpha$ -2 (Millipore, rabbit polyclonal IgG) were diluted at 1:50-100 in PBS with 3% bovine serum and 3% goat serum. Cells were washed five times with PBS with 1% bovine serum and incubated with secondary antibodies overnight at 4°C or for 2 hours at room temperature. For STORM imaging, Alexa Fluor 568, and 647 (ThermoFisher) at 1:200 in PBS with 3% bovine serum and 3% goat serum was used. When staining cells with antibodies raised against the same host animal, Zenon Alexa Fluor Labeling Kits were used. The ratio of fluorophore to primary antibody used was 8  $\mu\text{l}$  dye to 1  $\mu\text{g}$  of antibody. For STED imaging, Oregon Green 488, Alexa Fluor 532, and Alexa Fluor 555 (ThermoFisher) were used at 1:200-1000 in PBS with 3% bovine serum and 3% goat serum. When staining cells with antibodies raised against the same host animal, Zenon Alexa Fluor Labeling Kits were used. The ratio of fluorophore to primary antibody used was 5-8  $\mu\text{l}$  dye to 1  $\mu\text{g}$  of antibody. After secondary antibody incubation, cells were washed 5 times with PBS with 1% bovine serum. Cells for STED imaging were mounted onto coverslip with ProLong Diamond Antifade Mountant (ThermoFisher) and cured overnight at room temperature.

To validate specificity, NKA antibodies were quenched with peptide sequences specific to the isoform-specific epitope which was used to raise the antibody. These peptides are isoform-specific and prevent antibody interaction. The NKA  $\alpha$ 1 antibody used here was previously validated via peptide quenching and visualized through Western blot, where the antibody showed a single 100 kDa band that was prevented by the epitope peptide [11]. The NKA  $\alpha$ 2 antibody was tested here via the peptide quench approach (**Suppl Figure S1**). Increasing concentration of epitope peptide progressively quenched the NKA  $\alpha$ 2 antibody signal

at 100 kDa (and similarly at smaller bands are likely NKA  $\alpha 2$  degradation products). The RyR2 antibody used is frequently utilized and was validated in immunocytochemistry and super-resolution microscopy [25, 29].

### STORM Imaging

STORM super-resolution images were acquired using an Andor Discovery system (Andor Technologies) coupled to a Nikon Ti-E microscope (Nikon) with a 60x 1.45 TIRF oil objective (Nikon) and an iXon Ultra DU888 camera (Andor Technologies). A custom 2x camera magnification lens yielded a total magnification of 120x for a 112 nm effective pixel size. Fluorophores were excited with 150mW (488nm, 561nm, and 640nm) or 200mW (405nm) lasers housed in an Andor ILE (Andor Technologies). Images were acquired for 10,000 frames. Device control and image acquisition were enabled by Metamorph 7.8.12 (Molecular Devices). STORM image reconstruction and processing was performed using the ThunderSTORM plugin for ImageJ. Image reconstruction 5x magnification yielded a 22nm pixel size. The absence of secondary antibody specific STORM aberrations and negligible minimal autofluorescence was observed with primary antibody free cell images (**Suppl Figure S2**).

### STED Imaging

STED super-resolution images were acquired on Leica TCS SP8 STED 3X (Leica) microscope with a Leica HC PL APO 100x/1.40 oil STED WHITE objective (Leica) with HyD detectors (Leica). Pixel size was 24.15nm. Fluorophores were excited with a white light laser, WLL, (Leica) with an average power of 1.5mW and wavelength range from 470-670nm. STED depletion was performed by a 660nm STED 3X CW laser (Leica) with average power of 200 mW. Device control and image acquisition were enabled by LASX software (Leica). STED image deconvolution was performed by Huygens software (Scientific Volume Imaging). Negligible minimal autofluorescence was observed with primary antibody free cell images (**Suppl Figure S3**).

## RESULTS

### $\alpha 1$ and $\alpha 2$ Localization in SSL

To examine  $\alpha 1$  and  $\alpha 2$  expression patterns, adult mouse ventricular cardiac myocytes were stained with  $\alpha 1$  and  $\alpha 2$  antibodies, fluorescently labeled, and subsequently imaged with three-dimensional STED. The fluorescent signals from 3D reconstructions with volume rendering (including all z-planes) are shown in **Figure 1**, where both NKA- $\alpha 1$  and  $\alpha 2$  are apparent at the surface sarcolemma (SSL) and in transverse striations. In **Figure 2A and B** (left panels), we zoom in on two-dimensional maximum intensity projections for NKA- $\alpha 1$  and  $\alpha 2$ , respectively. The NKA clusters on the outer myocyte surface shell (0.66  $\mu\text{m}$  thick) that represents the SSL is shown in **Figure 2A-i, B-i**. This shell is immediately under a shrink-wrap surface that is used analytically to identify the outer myocyte edge in 3-D, with individual SSL clusters alone identified at right (**Figure 2A-ii, B-ii**). The STED images show that both  $\alpha 1$  and  $\alpha 2$  are present at the SSL, but that obvious structural organization is not apparent.

Cluster identification and analysis showed that SSL localized  $\alpha 1$  clusters are similar to  $\alpha 2$  clusters in terms of distribution of cluster size (**Figure 2C**) and mean size  $\sim 0.038 \mu\text{m}^2$  (**Figure 2D**). There was a much higher density of  $\alpha 1$  vs.  $\alpha 2$  clusters (per  $\mu\text{m}^2$ ; **Figure 2E**), consistent with data showing  $\alpha 1$  as the predominant SSL isoform in cardiac myocytes [9-11]. The lower number of  $\alpha 2$  clusters also results in a larger neighbor-to-neighbor distance between  $\alpha 2$  clusters vs.  $\alpha 1$  clusters, based either on distribution analysis or simply the mean nearest

neighbor distance (**Figure 2F-G**). Initial analysis of co-localization between  $\alpha 1$  and  $\alpha 2$ , did not show anything striking, and the relative paucity of co-localization is consistent with the isoform selectivity of the antibodies used (**Suppl Figure S1**).

### **$\alpha 1$ and $\alpha 2$ Localization at Longitudinal vs. transverse TT domains (STED)**

Next, we peeled off the 0.66  $\mu\text{m}$  surface layer that was analyzed in **Figure 2**, resulting in strikingly different intracellular patterns for  $\alpha 1$  and  $\alpha 2$  distributions (**Figure 3**). The 3D reconstructed z-stack STED images of NKA- $\alpha 1$  shows an intricate internal network of transverse as well as longitudinal TT components (**Figure 3A**). These longitudinal tubules are perpendicular to and appear to connect adjacent TTs. Prior work has shown that up to 40% of the TT system is in such longitudinal components [25]. While some of the longitudinal tubules run the length of the myocyte and others connect only a pair of T-tubules,  $\alpha 1$  is present in both TT components at similar apparent intensity.

NKA  $\alpha 2$  localization was strikingly different (**Figure 3B**), being much more concentrated in the strictly transverse TT components, with very little in the longitudinal tubule network. This major difference in NKA  $\alpha 1$  vs.  $\alpha 2$  distribution that is visible in full z-stacks is also clear in thinner section (0.256  $\mu\text{m}$  deep) enlargements spanning 3-4 sarcomeres (**Figure 3C, D**).

To analyze this quantitatively, we applied a Riesz transform to reveal the orientation of the clusters (**Figure 3C-i, D-i**) and categorized cluster segments as predominantly transverse (red) vs. longitudinal (yellow). It can be seen that both  $\alpha 1$  and  $\alpha 2$  are clearly present transversely, but that only  $\alpha 1$  shows prominent longitudinal components. In contrast, the longitudinal  $\alpha 2$  elements that are apparent are far more rudimentary.

We also measured the mean orientation angles of each segment connecting 2 nearest neighbor clusters (at >250 nm length, **Suppl Figure S4**) with respect to transverse orientation ( $\theta=0^\circ$ ). The all-cluster-pair histograms (**Figure 3C-ii, D-ii**) are corrected for the intrinsic problem that any individual cluster pair could have a main orientation angle that is nearly random, even if they are along the same slightly wiggly Z-line. This amounts to removing a small (<10%) baseline in **Figures 3C-ii and D-ii**. To further preclude this nearest-neighbor angular noise, for **Figure 3E** we only used segments of at least 600 nm, where there were at least 3 clusters. For  $\alpha 2$ , 92% are transversely oriented ( $\theta<30^\circ$ ) compared to 8% in the longitudinal direction ( $\theta>60^\circ$ ). There are still some longitudinal  $\alpha 2$  components, but these are fewer (**Figure 3E**), and these are also typically shorter in length (**Suppl Figure S4**). In contrast, for  $\alpha 1$  cluster orientation (vs.  $\alpha 2$ ), the percent transverse is smaller and longitudinal is greater, with similar numbers longitudinal ( $\theta>60^\circ$ ) and transverse ( $\theta<30^\circ$ ). Overall, 56% of  $\alpha 1$  clusters were longitudinally oriented, vs. 8% for  $\alpha 2$  (**Figure 3E**). This unbiased analysis confirms the striking visual difference in NKA- $\alpha 1$  vs.  $\alpha 2$  organization, where  $\alpha 2$  appears confined primarily to transverse TT elements, whereas  $\alpha 1$  is equally likely to be in longitudinal vs. transverse components.

### **Subsurface TT concentration of NKA- $\alpha 2$**

In analyzing  $\alpha 1$  and  $\alpha 2$  STED images, we noticed what might be a higher  $\alpha 2$  concentration, just below the outer sarcolemmal shell. An example suggesting this is shown in single x-y plane STED images, with higher resolution than available in the z-axis. **Figure 4** is a thin slice (0.256  $\mu\text{m}$  thick in z-axis direction) about halfway up the myocyte, where the lateral edges are typically the most vertically oriented. That means that the SSL above and below that plane are best in-register. We analyzed the highlighted region of this transverse slab including 4 TT (**Figure 4A, B**). **Figure 4C** shows intensity profiles along the transverse slice, normalized to the minimum fluorescence at mid-sarcomere between TT (i.e. where no sarcolemma or NKA is expected).

The maximum fluorescence marks the cell surface ( $x=0$ ) and the amplitude is also normalized so that both  $\alpha1$  and  $\alpha2$  signals both vary between 0 and 1. For  $\alpha1$ , this line plot is relatively flat inside the myocyte, except at identifiable longitudinal TT that cross this field (at  $\sim 1.4$ ,  $4.4$  and  $5.9$   $\mu\text{m}$ ). In contrast,  $\alpha2$  exhibits a hump centered near  $0.8$   $\mu\text{m}$  from the surface peak and gradually declines deeper into the myocyte. Averaging the subsurface region (defined as the region  $0.45$ - $1$   $\mu\text{m}$  away from the cell surface) from three cells, there tends to be relatively higher  $\alpha2$  signal than  $\alpha1$  signal at the subsurface region (**Figure 4D**).

These individual transverse slices provided the impetus for a more systematic analysis to test whether a subsurface microdomain of  $\alpha2$  concentration is present throughout the myocyte. For this we looked at the outer SSL shell ( $0.9$   $\mu\text{m}$  thick) vs. the next subsurface shell  $0.9$   $\mu\text{m}$  depth through segmentation of the 3D STED super-resolution images and compared the isoform signals (**Figure 5A**). The left panels show axial views of the regions probed, the middle panels show the fluorescence in that same view, and the right panels show a  $90^\circ$  rotation around the x-axis, providing a bottom surface view. For  $\alpha1$ , the subsurface shell appears similar to the surface shell, whereas for  $\alpha2$ , the subsurface is brighter than the surface. This can be seen quantitatively when we measured the average fluorescence for each shell at different distances up from the myocyte bottom (**Figure 5B**). For  $\alpha1$ , the average fluorescence (normalized to the peak of the surface shell) was similar in both shells, whereas the  $\alpha2$  subsurface signal was always higher than the surface signal (**Figure 5C**). Overall, for  $\alpha1$ , there was no difference between Surface and Sub-surface density, whereas for  $\alpha2$  the Sub-surface density was higher than on the Surface (**Figure 5D**).

Since this subsurface domain is hard to truly exclude from the SSL shell, this might cause us to underestimate both  $\alpha1$  predominance on the SSL and the relative TT concentration of  $\alpha2$ , compared to prior functional studies. This TT neck region is also where microfolds and BIN1 protein are known to be localized [30, 31], factors might contribute to a relative concentration of NKA- $\alpha2$  in this region.

### **STORM imaging of NKA- $\alpha1$ , NKA- $\alpha2$ and RyR2**

The strong transverse orientation of NKA- $\alpha2$  in the TT network brings us to directly test the hypothesis that  $\alpha2$  is preferentially anchored at SR junctions where RyR2 resides. We turned to STORM imaging, which offers potentially higher spatial resolution than STED, to measure proximity of NKA- $\alpha1$  vs.  $\alpha2$  to RyR2 in the junctional SR. Adult mouse ventricular cardiac myocytes were stained with  $\alpha1$ ,  $\alpha2$ , and RyR2 antibodies and protein localization was observed. **Figure 6A-F** shows confocal images of  $\alpha1$ ,  $\alpha2$ , and RyR2 immunostaining in isolated mouse ventricular cardiac myocytes, with z-line localization for all three probes. The confocal images show that RyR2 localization seems sharpest in the expected transverse stripes (**Figure 6F**), and that NKA- $\alpha1$  and  $\alpha2$  exhibit strong staining within z-lines with occasional extensions in the longitudinal direction (especially for  $\alpha1$ ; **Figure 6D, E**) as seen with STED imaging in **Figure 3**.

The same regions were also subjected to super-resolution STORM imaging, showing sharper individual clusters of  $\alpha1$ ,  $\alpha2$ , and RyR2 TT structure (**Figure 6G-I**) vs. confocal microscopy (**Figure 6D-F**). **Figures 6J-L** compare confocal vs. STORM images from the same myocyte regions, which emphasizes this enhanced sharpness. The confocal signals at the T-tubule are generally continuous along the length of the T-tubules, with occasional gaps. With STORM, the fluorescent signal at the T-tubule is resolved into small clusters of signal that are aligned primarily along the T-tubules. Indeed, individual T-tubules show much higher detail and narrower width at the T-tubule with STORM. Plot profiles along the longitudinal scale of a sarcomere ( $1.6$   $\mu\text{m}$ ) with  $0.1$   $\mu\text{m}$  width show that the full width at half maximum (FWHM) of the

apparent T-tubule is 75-80% narrower with STORM imaging than confocal imaging (approximately 0.2  $\mu\text{m}$  as expected; **Figure 6M-O**).

### **NKA- $\alpha$ 1 vs. $\alpha$ 2 clusters visualized in STORM imaging**

Individual protein clusters and their peak intensity centroids are identified based on the stochastic individual blinking events that characterize single molecule microscopy. Raw STORM images are reconstructed based the Gaussian distributions of single molecule blinking events (**Figure 7A**). The raw STORM reconstructions are then thresholded based on intensity (90 percentile) and size ( $>25 \text{ nm}^2$ ) to eliminate cellular autofluorescence (**Figure 7B**). The subtracted background is shown in **Figure 7C**, with brightness in the top left quadrant artificially increased 3-fold. Here, the brightened quadrant shows the lack of structural organization of the background signal (vs. the organized cell structure in **Figure 7B**), as well as the dimness of the background in the other 3 quadrants (vs. **Figure 7B**). Individual protein clusters and their peak intensity centroids (**Figure 7D and 7E**, respectively) are based on the Gaussian distribution of the fluorescent blink positions. A key advantage of this approach is that in regions of high protein aggregation (many at the T-tubule regions), these regions can be separated into individual adjacent clusters (**Figure 7D**). This cluster separation allows for a more detailed analysis of the proteins clusters, which is needed for characterizing  $\alpha$ 1 and  $\alpha$ 2 cluster localization and proximity to RyR2 clusters.

NKA- $\alpha$ 1 and  $\alpha$ 2 clusters differ in the number of clusters per  $\mu\text{m}^2$  (density), cluster size, and inter-cluster distance (**Figure 7F-J**). The mean size of NKA- $\alpha$ 1 clusters are larger than those for  $\alpha$ 2 (0.046 vs. 0.033  $\mu\text{m}^2$ ; (**Figure 7H**)). While the frequency distribution of NKA- $\alpha$ 1 and  $\alpha$ 2 cluster sizes (**Figure 7G**) are similar in shape and mode,  $\alpha$ 2 has a higher frequency of clusters that are smaller than the mode, whereas  $\alpha$ 1 has a larger proportion of larger clusters, extending through the long distribution tail (see **Figure 7G inset**). The overall density of  $\alpha$ 2 clusters is 34% higher than  $\alpha$ 1 (2.78 vs. 2.08  $\alpha$ 1 clusters/ $\mu\text{m}^2$ ), while the mean inter-distance between  $\alpha$ 2 clusters is slightly smaller vs. for  $\alpha$ 1 (0.26 vs. 0.31  $\mu\text{m}$ ; **Figure 7I, J**). The inverse relationship between cluster density and the inter-cluster distance is expected.

### **NKA- $\alpha$ 1 and $\alpha$ 2 localization with respect to RyR2**

RyR2 clusters were also identified and analyzed in **Figure 7**, like the NKA isoforms. To determine if NKA- $\alpha$ 2 vs.  $\alpha$ 1 is preferentially located near RyR2, mouse ventricular myocytes were examined with RyR2 plus either  $\alpha$ 1 or  $\alpha$ 2 labeled (**Figure 8A, B**). STORM images confirm that both NKA isoforms localize at z-lines near RyR2, but further quantitative analysis is required to determine differences between the two isoforms. To quantify the spatial relationship between NKA isoforms and RyR2, NKA clusters within a 200 nm radius of each RyR2 cluster were analyzed (the width of a T-tubule or junctional couplon).

The number of clusters near RyR2, defined by NKA clusters with their peak intensity centroids within the 200 nm radius, were counted (**Figure 8C**). For each RyR2 cluster, the mean number of NKA- $\alpha$ 2 cluster centroids within a 200 nm radius was 22% higher for  $\alpha$ 2 vs.  $\alpha$ 1 (0.62 vs. 0.51; **Figure 8C**). However, the mean cluster size was 32% smaller for these more numerous  $\alpha$ 2 clusters (0.040 vs. 0.059  $\mu\text{m}^2$ ; **Figure 8D**), negating the apparent  $\alpha$ 2 proximity. Moreover, the 22% higher  $\alpha$ 2 vs.  $\alpha$ 1 centroids near RyR2 is, if anything, lower than the overall 34% higher density of  $\alpha$ 1 (independent of RyR2 location; **Figure 7F**). Comparing the mean distance from RyR2 centroid to NKA centroid failed to show any difference for the NKA isoforms (**Figure 8E**). Moreover, if we only count the NKA cluster area within 200nm of RyR2 centroids, then the apparent amount of NKA- $\alpha$ 2 that falls within this 200 nm radius is significantly less than

for  $\alpha 1$  (**Figure 8F**). For each RyR2 cluster, 20% of the 200 nm radius is occupied by  $\alpha 1$  clusters while 16.5% is occupied by  $\alpha 2$  clusters, producing a  $\alpha 1$  to  $\alpha 2$  ratio of 1.21 (**Figure 8F**). The average distance from the RyR2 centroid to the nearest NKA centroid was identical (0.13  $\mu\text{m}$ ) for both  $\alpha 1$  and  $\alpha 2$  (from **Figure 8C** analysis). To be sure that we were not missing something by constraining the analysis to a 200 nm radius of the RyR2 centroid, we also extended the analysis in **Figure 8C-F** to different radii (**Suppl Figure S5**), with similar conclusions. These results lead us to conclude that there is no preferential localization of  $\alpha 2$  near RyR2 at the junctional cleft, and that our hypothesis was incorrect.

## DISCUSSION

In this study, we measured the distribution patterns of the NKA  $\alpha 1$  and  $\alpha 2$  isoforms in mouse ventricular myocytes using two super-resolution microscopic methods (STED and STORM). We confirmed prior work that had demonstrated higher NKA- $\alpha 2$  density in TT vs. SSL, but more regional uniformity in the density of the NKA- $\alpha 1$  isoform [9-11]. We also discovered several novel features that were particularly enabled by STED and STORM imaging: 1) At the outer sarcolemma NKA has no striking structural organization for either  $\alpha 1$  or  $\alpha 2$ ; 2) in the TT system NKA- $\alpha 2$  is almost entirely localized to the transverse elements, whereas  $\alpha 1$  is similarly prominent in both transverse and longitudinal TT elements **Figure 9A**; 3) NKA- $\alpha 2$  may exhibit some preferential localization just below the TT opening near the SSL; 4) within TT junctional RyR2 sites are not in preferential proximity to NKA- $\alpha 2$  vs.  $\alpha 1$ . The latter point appears to dispel the attractive hypothesis that it is selective cleft localization that drives the much higher concentration of NKA- $\alpha 2$  in TT [18, 28] (**Figure 9A**).

### T-tubular vs. Surface Sarcolemmal NKA expression

Prior NKA pump current measurements have shown that NKA- $\alpha 2$  is 4-6 fold more concentrated in rodent TT vs. SSL, whereas  $\alpha 1$  is similarly extant in both sarcolemmal regions [9-11]. Since  $\alpha 1$  also represents 71-89% of total NKA in rodents, we would expect ~10-fold higher NKA- $\alpha 1$  vs.  $\alpha 2$  on the myocyte surface. Our measure of more than twice as many  $\alpha 1$  vs.  $\alpha 2$  surface clusters (of similar size; **Figure 2E**) might underestimate this difference for two reasons. First, the  $\alpha 1$  and  $\alpha 2$  antibodies may have different labeling efficacies (as saturation of NKA sites or extent of fluorescence labeling). Second, any bleed-through of signal from the Sub-surface, where  $\alpha 2$  is more concentrated, would raise the apparent  $\alpha 2$  clusters counted (especially if  $\alpha 2$  is especially high near the TT mouth). These issues may affect less electrophysiology-based estimates in detubulated ventricular myocytes, so we suspect the actual SSL  $\alpha 2/\alpha 1$  ratio is closer to 10 than 2.

In transverse TT, there were slightly fewer  $\alpha 1$  vs.  $\alpha 2$  clusters, but the  $\alpha 1$  cluster sizes were larger (**Figure 7F-H**), yielding similar amounts of  $\alpha 1$  and  $\alpha 2$  signal at that location. That is consistent with similar amounts of each isoform in the TT, but accounting for the longitudinal TT elements that contain predominantly  $\alpha 1$ , the overall TT signal is stronger for  $\alpha 1$ . This again agrees qualitatively with the prior NKA pump current data, where  $\alpha 1$ -dependent current was higher than that for  $\alpha 2$  [9-11]. In rodent skeletal muscle, where NKA- $\alpha 2$  is the predominant overall isoform, the  $\alpha 2$  is highly concentrated in TTs vs. SSL, where nearly all of the TT NKA is  $\alpha 2$  [14, 15]. Indeed, in skeletal muscle  $\alpha 1$  seems responsible for bulk  $[\text{Na}^+]_i$  homeostasis while  $\alpha 2$  is more involved with contractile activity [13-17].



### **NKA in Transverse vs. Longitudinal TT elements**

Soeller and Cannell [25] showed that the TT system includes extensive longitudinal branching, such that only about 60% of the TT system was really oriented in the transverse direction. **Figure 3** demonstrates a striking difference in NKA isoform localization within the TT network. Whereas  $\alpha 2$  was highly concentrated in the transverse elements, it was largely excluded from the longitudinal TT elements. In contrast NKA- $\alpha 1$  appeared more uniformly distributed throughout both elements of the TT system. The  $\alpha 2$  isoform was not exclusively transverse, but the images give the impression that only small amounts of  $\alpha 2$  can escape the transverse elements to appear in longitudinal elements near the transverse branches. These results suggest that NKA- $\alpha 2$  is preferentially anchored (vs.  $\alpha 1$ ) in transverse TT elements. This might be in part mediated by ankyrin-B, based on work by Mohler *et al.* [32] which found NKA and ankyrin-B in TT. They also reported that NKA and ankyrin-B interacted, and that there was a loss of NKA- $\alpha 2$  as well as ankyrin-B in TT in mice heterozygous for ankyrin-B.

### **Possible subsurface NKA- $\alpha 2$ concentration in TT**

Since 40% of the transverse TT membrane is involved in SR junctions, this was still consistent with our junctional  $\alpha 2$  localization hypothesis. However, we also noticed a slight increase in  $\alpha 2$  localization (vs.  $\alpha 1$ ) roughly 0.5-1  $\mu\text{m}$  from the surface, near the external mouth of the TT (**Figure 4-5**). Our data are somewhat equivocal here, but intriguing because a similar location has been described for sarcolemmal microfolds rich in BIN1 protein [30, 31]. This raises possible molecular explanations for our observations. However, further studies would be required to test the possibility of this  $\alpha 2$ -rich locus, as well as its correspondence to BIN1-rich membrane microfolds.

### **Localization of NKA in proximity of RyR2**

The attractiveness of our initial hypothesis that  $\alpha 2$  preferentially concentrates (and may be anchored) at junctional TT domains, resulted in some surprise when the data (**Figure 8**) pointed so clearly against our hypothesis. Indeed, the fact that 40% of the TT is associated in SR junctions seemed to provide an ideal geometric setting for STORM-based discrimination of whether  $\alpha 2$  was preferentially close to RyR2 centroids (with  $\alpha 1$  being potentially excluded from those loci). Moreover, in confocal images RyR2 striations are nearly continuous (**Figure 6D-F**) which would preclude this sort of discrimination. However, the STORM results seem compelling (e.g. both  $\alpha 1$  and  $\alpha 2$  clusters are on average precisely 0.13  $\mu\text{m}$  from RyR2; **Figure 8E**), and cause us to reject our central hypothesis. So, while NKA- $\alpha 2$  is targeted to TT, and their transverse components in particular, we do not have evidence for either junctional targeting of  $\alpha 2$  or exclusion of  $\alpha 1$ . On the other hand, the higher  $\alpha 2$  expression in TT still enhances the overall NKA concentration in the transverse TT elements, above that in either the SSL or longitudinal TT elements.

### **Functional consequences of NKA isoform distribution**

So how does this new knowledge change our thinking about the functional consequences of NKA isoform localization? It was attractive to think that having all of the key  $\text{Na}^+$  and  $\text{Ca}^{2+}$  transporters and channels focused at the tiny cleft volume ( $\sim 5 \times 10^{-5}$  pL), such that elevation of local cleft  $[\text{Na}^+]_i$  (e.g. by selective NKA- $\alpha 2$  inhibition) could raise local cleft  $[\text{Ca}^{2+}]_i$  via NCX to promote stronger SR  $\text{Ca}^{2+}$  release and inotropy, as was suggested by some prior data [11, 18]. But if we consider this notion in more detail, and armed with our present results, that picture needs revision. We should consider that  $\text{Na}^+$  diffusion inside myocytes is quite fast [33], even in the submembrane space near  $\text{Na}^+$  channels and NCX [34], so that any local  $[\text{Na}^+]_i$  increase will

spread rapidly to nearby submembrane regions surrounding the cleft. Nevertheless, selective NKA- $\alpha$ 2 blockade can increase  $\text{Ca}^{2+}$  transients and contraction without altering global  $[\text{Na}^+]_i$  [11]. We conclude that the overall TT concentration of  $\alpha$ 2 suffices for this functional effect, without constraining all of the proteins and local  $[\text{Na}^+]_i$  and  $[\text{Ca}^{2+}]_i$  changes to the junctional cleft space.

One may well ask why blocking a similar total amount of NKA by partial  $\alpha$ 1 inhibition did not produce the same inotropic effect as blocking nearly all NKA- $\alpha$ 2 (20% of total NKA in both cases) [18]? The explanation, illustrated in **Figure 9B-C**, may be that blocking ~33% of  $\alpha$ 1 will inhibit  $\text{Na}^+$  efflux nearly 33% at the SSL and longitudinal TT (allowing a small rise in global  $[\text{Na}^+]_i$ ), but the TTs (near RyR junctions) experience only ~17% NKA inhibition (due to unblocked  $\alpha$ 2 in TT, which is about half of the total TT NKA). This would limit the inotropic effect of partial  $\alpha$ 1 block. The opposite is true for the  $\alpha$ 2-selective block, which blocks ~50% of the TT NKA, but very little of the SSL or longitudinal TT NKA. Thus for the same rise in global  $[\text{Na}^+]_i$ , the  $\alpha$ 2 block impact will be strongest in the TT-SR junction region, and so on contraction.

The novel aspects of NKA isoform distribution in ventricular myocytes borne through super-resolution microscopy described here, provides a clearer picture of how differential NKA localization can serve different functions, and may be part of different local protein and signaling complexes. The direct test, and refutation of a popular cleft-localization hypothesis also provides new physical constraints on exactly these same systems.

## ACKNOWLEDGEMENTS

We would like to thank Dr. Kimberley McAllister for generous access to STORM instrumentation, Dr. Ingrid Brust-Mascher for technical assistance with STED microscopy, and Max Bergman and Logan Bailey for myocyte preparation.

This work was supported in part through NIH grants (R01-HL081562 and R01-HL030077) and the NIH Training Program in Basic and Translational Cardiovascular Science (T32 HL086350).

## REFERENCES

- [1] G.E. Shull, A. Schwartz, J.B. Lingrel, Amino-acid sequence of the catalytic subunit of the ( $\text{Na}^+$  +  $\text{K}^+$ )ATPase deduced from a complementary DNA, *Nature* 316(6030) (1985) 691-5.
- [2] K.J. Sweadner, Isozymes of the  $\text{Na}^+/\text{K}^+$ -ATPase, *Biochim Biophys Acta* 988(2) (1989) 185-220.
- [3] J.B. Lingrel, T. Kuntzweiler,  $\text{Na}^+/\text{K}^+$ -ATPase, *J Biol Chem* 269(31) (1994) 19659-62.
- [4] G. Blanco, R.W. Mercer, Isozymes of the Na-K-ATPase: heterogeneity in structure, diversity in function, *Am J Physiol* 275(5 Pt 2) (1998) F633-50.
- [5] C.M. Stanley, D.G. Gagnon, A. Bernal, D.J. Meyer, J.J. Rosenthal, P. Artigas, Importance of the Voltage Dependence of Cardiac Na/K ATPase Isozymes, *Biophys J* 109(9) (2015) 1852-62.
- [6] R. Zahler, M. Gilmore-Hebert, J.C. Baldwin, K. Franco, E.J. Benz, Jr., Expression of alpha isoforms of the Na,K-ATPase in human heart, *Biochim Biophys Acta* 1149(2) (1993) 189-94.
- [7] P.A. Lucchesi, K.J. Sweadner, Postnatal changes in Na,K-ATPase isoform expression in rat cardiac ventricle. Conservation of biphasic ouabain affinity, *J Biol Chem* 266(14) (1991) 9327-31.
- [8] I. Dostanic, J.N. Lorenz, J. Schultz Jel, I.L. Grupp, J.C. Neumann, M.A. Wani, J.B. Lingrel, The alpha2 isoform of Na,K-ATPase mediates ouabain-induced cardiac inotropy in mice, *J Biol Chem* 278(52) (2003) 53026-34.
- [9] S. Despa, D.M. Bers, Functional analysis of  $\text{Na}^+/\text{K}^+$ -ATPase isoform distribution in rat ventricular myocytes, *Am J Physiol Cell Physiol* 293(1) (2007) C321-7.
- [10] R.G. Berry, S. Despa, W. Fuller, D.M. Bers, M.J. Shattock, Differential distribution and regulation of mouse cardiac  $\text{Na}^+/\text{K}^+$ -ATPase alpha1 and alpha2 subunits in T-tubule and surface sarcolemmal membranes, *Cardiovasc Res* 73(1) (2007) 92-100.

- [11] F. Swift, N. Tovsrud, U.H. Enger, I. Sjaastad, O.M. Sejersted, The Na<sup>+</sup>/K<sup>+</sup>-ATPase alpha2-isoform regulates cardiac contractility in rat cardiomyocytes, *Cardiovasc Res* 75(1) (2007) 109-17.
- [12] S. Despa, F. Brette, C.H. Orchard, D.M. Bers, Na/Ca exchange and Na/K-ATPase function are equally concentrated in transverse tubules of rat ventricular myocytes, *Biophys J* 85(5) (2003) 3388-96.
- [13] S. He, D.A. Shelly, A.E. Moseley, P.F. James, J.H. James, R.J. Paul, J.B. Lingrel, The alpha(1)- and alpha(2)-isoforms of Na-K-ATPase play different roles in skeletal muscle contractility, *Am J Physiol Regul Integr Comp Physiol* 281(3) (2001) R917-25.
- [14] H.S. Hundal, D.L. Maxwell, A. Ahmed, F. Darakhshan, Y. Mitsumoto, A. Klip, Subcellular distribution and immunocytochemical localization of Na,K-ATPase subunit isoforms in human skeletal muscle, *Mol Membr Biol* 11(4) (1994) 255-62.
- [15] M. Kristensen, M.K. Rasmussen, C. Juel, Na(+)-K (+) pump location and translocation during muscle contraction in rat skeletal muscle, *Pflugers Arch* 456(5) (2008) 979-89.
- [16] T.L. Radzyukevich, A.E. Moseley, D.A. Shelly, G.A. Redden, M.M. Behbehani, J.B. Lingrel, R.J. Paul, J.A. Heiny, The Na<sup>+</sup>-K<sup>+</sup>-ATPase alpha2-subunit isoform modulates contractility in the perinatal mouse diaphragm, *Am J Physiol Cell Physiol* 287(5) (2004) C1300-10.
- [17] X. Yuan, Z. Lin, S. Luo, G. Ji, C. Yuan, Y. Wu, Effects of different magnitudes of cyclic stretch on Na<sup>+</sup>-K<sup>+</sup>-ATPase in skeletal muscle cells in vitro, *J Cell Physiol* 212(2) (2007) 509-18.
- [18] S. Despa, J.B. Lingrel, D.M. Bers, Na<sup>+</sup>/K<sup>+</sup>-ATPase alpha2-isoform preferentially modulates Ca<sup>2+</sup> transients and sarcoplasmic reticulum Ca<sup>2+</sup> release in cardiac myocytes, *Cardiovasc Res* 95(4) (2012) 480-6.
- [19] P.F. James, I.L. Grupp, G. Grupp, A.L. Woo, G.R. Askew, M.L. Croyle, R.A. Walsh, J.B. Lingrel, Identification of a specific role for the Na,K-ATPase alpha 2 isoform as a regulator of calcium in the heart, *Mol Cell* 3(5) (1999) 555-63.
- [20] I. Dostanic, J. Schultz Jel, J.N. Lorenz, J.B. Lingrel, The alpha 1 isoform of Na,K-ATPase regulates cardiac contractility and functionally interacts and co-localizes with the Na/Ca exchanger in heart, *J Biol Chem* 279(52) (2004) 54053-61.
- [21] P.J. Mohler, J.Q. Davis, V. Bennett, Ankyrin-B coordinates the Na/K ATPase, Na/Ca exchanger, and InsP3 receptor in a cardiac T-tubule/SR microdomain, *PLoS Biol* 3(12) (2005) e423.
- [22] F. Swift, N. Tovsrud, I. Sjaastad, O.M. Sejersted, E. Niggli, M. Egger, Functional coupling of alpha(2)-isoform Na<sup>+</sup>/K<sup>+</sup>-ATPase and Ca<sup>2+</sup> extrusion through the Na<sup>+</sup>/Ca<sup>2+</sup>-exchanger in cardiomyocytes, *Cell Calcium* 48(1) (2010) 54-60.
- [23] T. Yamamoto, Z. Su, A.E. Moseley, T. Kadono, J. Zhang, M. Cougnon, F. Li, J.B. Lingrel, W.H. Barry, Relative abundance of alpha2 Na<sup>+</sup> pump isoform influences Na<sup>+</sup>-Ca<sup>2+</sup> exchanger currents and Ca<sup>2+</sup> transients in mouse ventricular myocytes, *J Mol Cell Cardiol* 39(1) (2005) 113-20.
- [24] E. Page, M. Surdyk-Droske, Distribution, surface density, and membrane area of diadic junctional contacts between plasma membrane and terminal cisterns in mammalian ventricle, *Circ Res* 45(2) (1979) 260-7.
- [25] C. Soeller, M.B. Cannell, Examination of the transverse tubular system in living cardiac rat myocytes by 2-photon microscopy and digital image-processing techniques, *Circ Res* 84(3) (1999) 266-75.
- [26] M. Juhaszova, M.P. Blaustein, Na<sup>+</sup> pump low and high ouabain affinity alpha subunit isoforms are differently distributed in cells, *Proc Natl Acad Sci U S A* 94(5) (1997) 1800-5.
- [27] J. Zhang, M.Y. Lee, M. Cavalli, L. Chen, R. Berra-Romani, C.W. Balke, G. Bianchi, P. Ferrari, J.M. Hamlyn, T. Iwamoto, J.B. Lingrel, D.R. Matteson, W.G. Wier, M.P. Blaustein, Sodium pump alpha2 subunits control myogenic tone and blood pressure in mice, *J Physiol* 569(Pt 1) (2005) 243-56.
- [28] M.P. Blaustein, L. Chen, J.M. Hamlyn, F.H. Leenen, J.B. Lingrel, W.G. Wier, J. Zhang, Pivotal role of alpha2 Na<sup>+</sup> pumps and their high affinity ouabain binding site in cardiovascular health and disease, *J Physiol* 594(21) (2016) 6079-6103.
- [29] D.R. Scriven, P. Dan, E.D. Moore, Distribution of proteins implicated in excitation-contraction coupling in rat ventricular myocytes, *Biophys J* 79(5) (2000) 2682-91.
- [30] T. Hong, H. Yang, S.S. Zhang, H.C. Cho, M. Kalashnikova, B. Sun, H. Zhang, A. Bhargava, M. Grabe, J. Olgin, J. Gorelik, E. Marban, L.Y. Jan, R.M. Shaw, Cardiac BIN1 folds T-tubule membrane, controlling ion flux and limiting arrhythmia, *Nat Med* 20(6) (2014) 624-32.
- [31] T. Hong, R.M. Shaw, Cardiac T-Tubule Microanatomy and Function, *Physiol Rev* 97(1) (2017) 227-252.

- [32] P.J. Mohler, J.J. Schott, A.O. Gramolini, K.W. Dilly, S. Guatimosim, W.H. duBell, L.S. Song, K. Haurogne, F. Kyndt, M.E. Ali, T.B. Rogers, W.J. Lederer, D. Escande, H. Le Marec, V. Bennett, Ankyrin-B mutation causes type 4 long-QT cardiac arrhythmia and sudden cardiac death, *Nature* 421(6923) (2003) 634-9.
- [33] S. Despa, J. Kockskemper, L.A. Blatter, D.M. Bers, Na/K pump-induced  $[Na]_i$  gradients in rat ventricular myocytes measured with two-photon microscopy, *Biophys J* 87(2) (2004) 1360-8.
- [34] C.R. Weber, V. Piacentino, 3rd, K.S. Ginsburg, S.R. Houser, D.M. Bers,  $Na^+Ca^{2+}$  exchange current and submembrane  $[Ca^{2+}]$  during the cardiac action potential, *Circ Res* 90(2) (2002) 182-9.

## FIGURE LEGENDS

### Figure 1: 3D reconstruction of high-resolution STED images of NKA isoforms

3D reconstructions with volume rendering of mouse ventricular myocytes stained with NKA- $\alpha$ 1 (Alexa Fluor 555) in blue and NKA- $\alpha$ 2 (Oregon Green 488) in green from STED super-resolution imaging; scale bars are 10  $\mu$ m. Both isoforms are present at the SSL and in transverse striations. Volumes were rendered with an adapted opacity transfer function to highlight SSL NKA isoform distribution. Fluorescence intensity scale (top) is in arbitrary units.

### Figure 2: Surface Sarcolemma (SSL) distribution of NKA isoforms

SSL of myocytes stained with NKA- $\alpha$ 1 and  $\alpha$ 2 were isolated from the stack of STED images by isolating a 0.66  $\mu$ m thick outer myocyte surface shell through image segmentation and edge detection techniques. **A, B:** Maximum intensity projections of NKA- $\alpha$ 1 (A) and NKA- $\alpha$ 2 (B). **A-i, B-i:** Identification of SSL clusters from 0.66  $\mu$ m thick outer surface; scale bars are 2  $\mu$ m. Any clusters identified beyond 0.66  $\mu$ m from SSL of the myocyte were excluded. **A-ii, B-ii:** Individual NKA- $\alpha$ 1 and  $\alpha$ 2 clusters, separated by contrasting colors; scale bars are 2  $\mu$ m. Individual clusters are distinguished by differentiating colors.  $\alpha$ 1 SSL clusters are more densely distributed than  $\alpha$ 2 SSL clusters. **C:** Cluster size distribution histogram of  $\alpha$ 1 (blue) and  $\alpha$ 2 (green). Cluster sizes of  $\alpha$ 1 and  $\alpha$ 2 have the same mode (0.004  $\mu$ m<sup>2</sup>) and distribution patterns. **D:** Mean area of  $\alpha$ 1 and  $\alpha$ 2 clusters. Mean area between  $\alpha$ 1 and  $\alpha$ 2 are not significantly different (0.037 vs. 0.034  $\mu$ m<sup>2</sup>). **E:** Density of clusters.  $\alpha$ 1 clusters are nearly twice as dense as  $\alpha$ 2 clusters (2.11 vs. 1.14 clusters/ $\mu$ m<sup>2</sup>). **F:** Cluster nearest neighbor distance distribution histogram of  $\alpha$ 1 and  $\alpha$ 2. The mode for  $\alpha$ 1 nearest neighbor is smaller than that of  $\alpha$ 2 (0.45 vs 0.5  $\mu$ m) and  $\alpha$ 2 possesses a larger right tail, signifying a higher proportion of larger distances. **G:** Mean nearest neighbor distance between  $\alpha$ 1 and  $\alpha$ 2.  $\alpha$ 1 has a significantly shorter mean nearest neighbor distance than  $\alpha$ 2 (0.42 vs. 0.53  $\mu$ m) clearly indicating a higher density of  $\alpha$ 1 clusters at the SSL. (n = 3 cells, statistical analysis; t-test)

### Figure 3: T-Tubular network distribution of NKA isoforms

The TT network was revealed in stacks of STED images by removing the 0.66  $\mu$ m thick outer SSL surface shell (converse of Figure 2A-B). **A, B:** NKA- $\alpha$ 1 and NKA- $\alpha$ 2 fluorescence signal from inner TT structures, respectively. 3D reconstructions by volume rendering (with an adapted opacity transfer function) showing  $\alpha$ 1 presence throughout this intricate tubular network (A), while  $\alpha$ 2 is mainly in the transverse direction (B). **C, D:** Maximum intensity projections of slabs of TT network show that  $\alpha$ 1 (3  $\mu$ m thick) contains multiple longitudinal elements spanning multiple TTs while  $\alpha$ 2 (1.1  $\mu$ m thick) is more exclusively in the transverse elements. **C-i, D-i:** Orientation analysis based on Riesz transform representations (of C and D) categorizing cluster segments as either transverse (red) or longitudinal (yellow). **C-ii, D-ii:** Length and orientation of each segment were measured in C-i, D-i, and the fractions of segments at each angle versus

transverse (regardless the segment length). Each distribution totals 1 (Transverse or Longitudinal);  $n = 3$  cells. **E**: Orientation of segments with length  $> 0.6 \mu\text{m}$ , showing predominantly transverse orientation for  $\alpha 2$  and nearly equal amounts longitudinal and transverse for  $\alpha 1$ . ( $n = 3$  cells).

#### **Figure 4: NKA isoform transverse profiles**

Transverse profiles of NKA in STED microscopy. Single plane images co-stained for NKA- $\alpha 1$  and  $\alpha 2$ . **A, B**: Representative images of  $\alpha 1$  (A) and  $\alpha 2$  (B). Sections of 4-5 sarcomeres, roughly  $8 \mu\text{m}$  in length in the transverse direction were quantified (dotted box). Fluorescent signal from each sarcomere (arrows), were averaged to create transverse fluorescent intensity plot profiles. **C**: Representative average fluorescent intensities. Minimum average fluorescence was subtracted from each point and amplitude normalized to peak SSL intensity. Peak at  $x=0$  is the cell surface, and lower peaks in  $\alpha 1$  trace are from identifiable longitudinal tubules. Just beneath the SSL,  $\alpha 2$  signal is enriched. **D**: Quantification of  $\alpha 1$  and  $\alpha 2$  fluorescence Sub-SSL signal (from the region  $0.45\text{-}1 \mu\text{m}$  inside the cell surface), normalized to peak SSL intensity. ( $n = 3$  cells)

#### **Figure 5: Distribution of NKA isoforms at subsurface**

Myocyte surface shell and subsurface shells ( $0.9 \mu\text{m}$  thick) were segmented from STED image stacks. **A**: Top row is NKA- $\alpha 1$  SSL shell with binary mask for segmentation (left), corresponding volume rendering of fluorescence (middle) and the same volume rotated  $90^\circ$  around the x-axis (right). Second row is NKA- $\alpha 1$  Sub-SSL with the same layout as the previous row. Last two rows show NKA- $\alpha 2$  SSL and subsurface, respectively. All volumes were rendered with the same opacity transfer function for consistency in fluorescence intensity scale. **B, C**: Shell fluorescence profiles for  $\alpha 1$  (B) and  $\alpha 2$  (C) with respect to distance above the bottom surface (normalized to peak surface intensity). Signal attenuation from light scattering and absorption with increasing depth was not corrected. Surface and Sub-surface signal are similar for  $\alpha 1$ , but for  $\alpha 2$  Sub-surface is higher than Surface. **D**: Average fluorescence signals for  $\alpha 1$  and  $\alpha 2$ . ( $n = 3$  cells; statistical analysis: t-test)

#### **Figure 6: NKA and RyR2 STORM vs. confocal images**

**A-C**: Myocyte confocal images of  $\alpha 1$  (Alexa Fluor 647) (A),  $\alpha 2$  (Alexa Fluor 647) (B), and RyR2 (Alexa Fluor 568) (C) in mouse cardiac myocyte. **D-I**: Enlarged views of the box regions in A-C in confocal (D-F) and STORM (G-I) microscopy. **J-L**: Enlarged views of the box regions in D-I of individual z-lines (confocal left, STORM right). **M-O**: Plot profile of indicated regions of  $1.6 \mu\text{m}$  long by  $0.1 \mu\text{m}$  wide in (J-L); normalized to maximum intensity within plot profile. FWHM for STORM images were 21-26% of that in confocal images.

#### **Figure 7: NKA cluster characteristics in STORM images**

**A-C**: Raw (A) and corrected (B) STORM RyR2 (Alexa Fluor 568) reconstructed image based on blinks from 10,000 frames, and the subtracted background image (C) used for correction. Background signal included points with less than 90 percentile of fluorescent intensity and cluster size ( $>25 \text{nm}^2$ ). Upper left quadrant in C is increased 3-fold in intensity to better visualize the lack of structural organization in the background signal. **D**: Corrected Image with individual STORM clusters identified (by color). Clusters are identified based on peak intensity values with Gaussian distributions (or centroids) indicated in **E**. Each centroid corresponds to an individual

cluster in panel D. **F:** density (per  $\mu\text{m}^2$ ) of  $\alpha 1$ ,  $\alpha 2$ , and RyR2 clusters in the TT region. **G, H:** Cluster size frequency histogram (G) shows similar modes between (near  $0.014 \mu\text{m}^2$ ) for  $\alpha 1$ ,  $\alpha 2$ , and RyR2, but mean cluster size for  $\alpha 1$  is larger than for  $\alpha 2$  (H). Inset in G shows a slightly larger distribution of larger clusters in  $\alpha 1$ . **I, J:** Inter-cluster distance (between centroids) frequency histogram (I) and mean values (J) for  $\alpha 1$ ,  $\alpha 2$ , and RyR2 clusters. Modes for  $\alpha 1$  and  $\alpha 2$  were identical ( $0.018 \mu\text{m}$ ), but for  $\alpha 1$  more long distances contribute to a larger mean value. ( $n = 11$  ( $\alpha 1$ ),  $9$  ( $\alpha 2$ ), and  $20$  (RyR2) cells; statistical analysis: t-test)

### Figure 8: T-Tubular NKA isoform localization near RyR2

**A:** STORM image of NKA- $\alpha 1$  (Alexa Fluor 647; blue) and RyR2 (Alexa Fluor 568; red). **B:** STORM image of NKA- $\alpha 2$  (Alexa Fluor 647; green) and RyR2 (Alexa Fluor 568; red). **C:** Mean number of NKA isoform cluster centroids within  $0.2 \mu\text{m}$  radius of each RyR2 cluster centroid (illustration of analysis criteria at right). **D:** Mean size of NKA isoform clusters whose centroids are within  $0.2 \mu\text{m}$  radius of the RyR2 cluster centroid. **E:** Mean distance between RyR2-NKA cluster centroids within  $0.2 \mu\text{m}$  radius of RyR2 clusters ( $0.13 \mu\text{m}$  for both). **F:** Mean total area of NKA cluster within  $0.2 \mu\text{m}$  radius of RyR2 clusters, as percentage the total  $0.2 \mu\text{m}$  radius circle. This area includes portions of any NKA clusters within  $0.2 \mu\text{m}$  radius of RyR2 clusters. ( $n = 11$  ( $\alpha 1$ ),  $9$  ( $\alpha 2$ ), and  $20$  (RyR2) cells; statistical analysis: t-test)

### Figure 9: NKA isoform distribution in mouse ventricular myocytes.

**A:** This cartoon illustrates the structural conclusions that NKA- $\alpha 1$  (blue circles) is relatively uniform along the entire sarcolemma (surface as well transverse and axial TT components), whereas NKA- $\alpha 2$  (red circles) is especially concentrated in the transverse TT components. **B:** Blocking all of the NKA- $\alpha 2$  (black circles) would suppress total NKA transport by  $\sim 50\%$  in TT, with limited impact on transport in surface or longitudinal (axial) TT regions. **C:** Conversely, blocking  $33\%$  of NKA- $\alpha 1$  would suppress total NKA transport by nearly  $33\%$  at the surface and axial TT regions, but only by  $\sim 17\%$  in the transverse TT region.

Figure 1. 3D reconstruction of high-resolution STED images of NKA isoforms

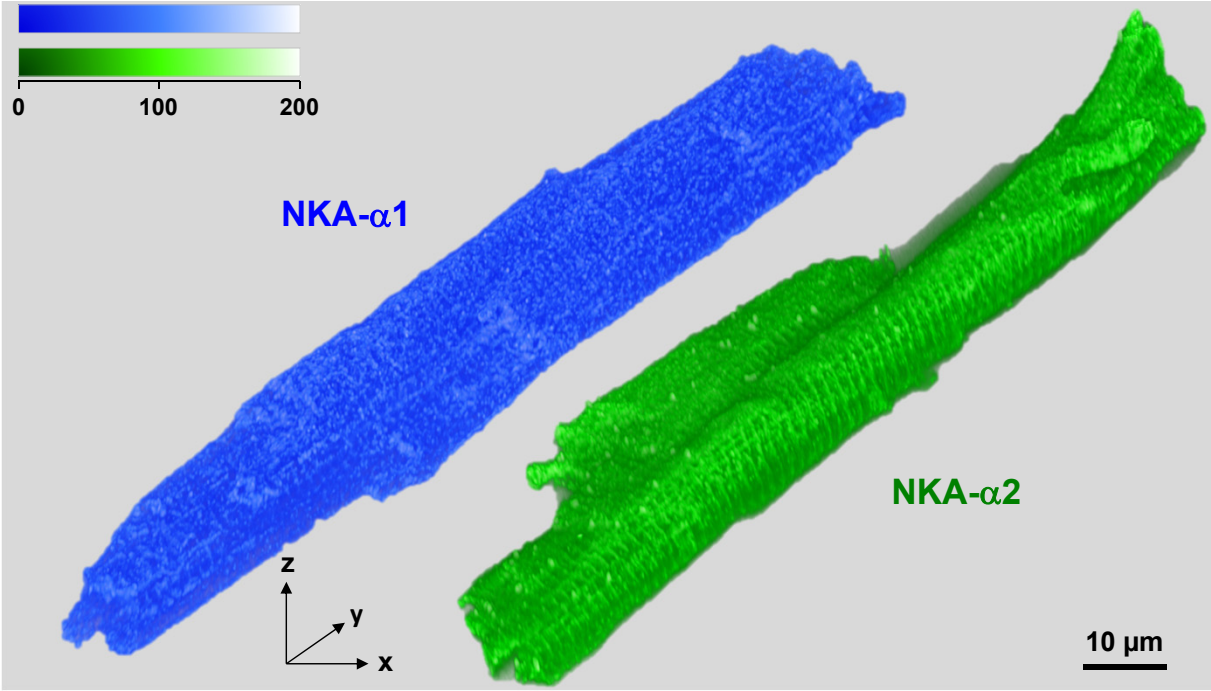

**Figure 2. Distribution of NKA isoforms at the surface membrane**

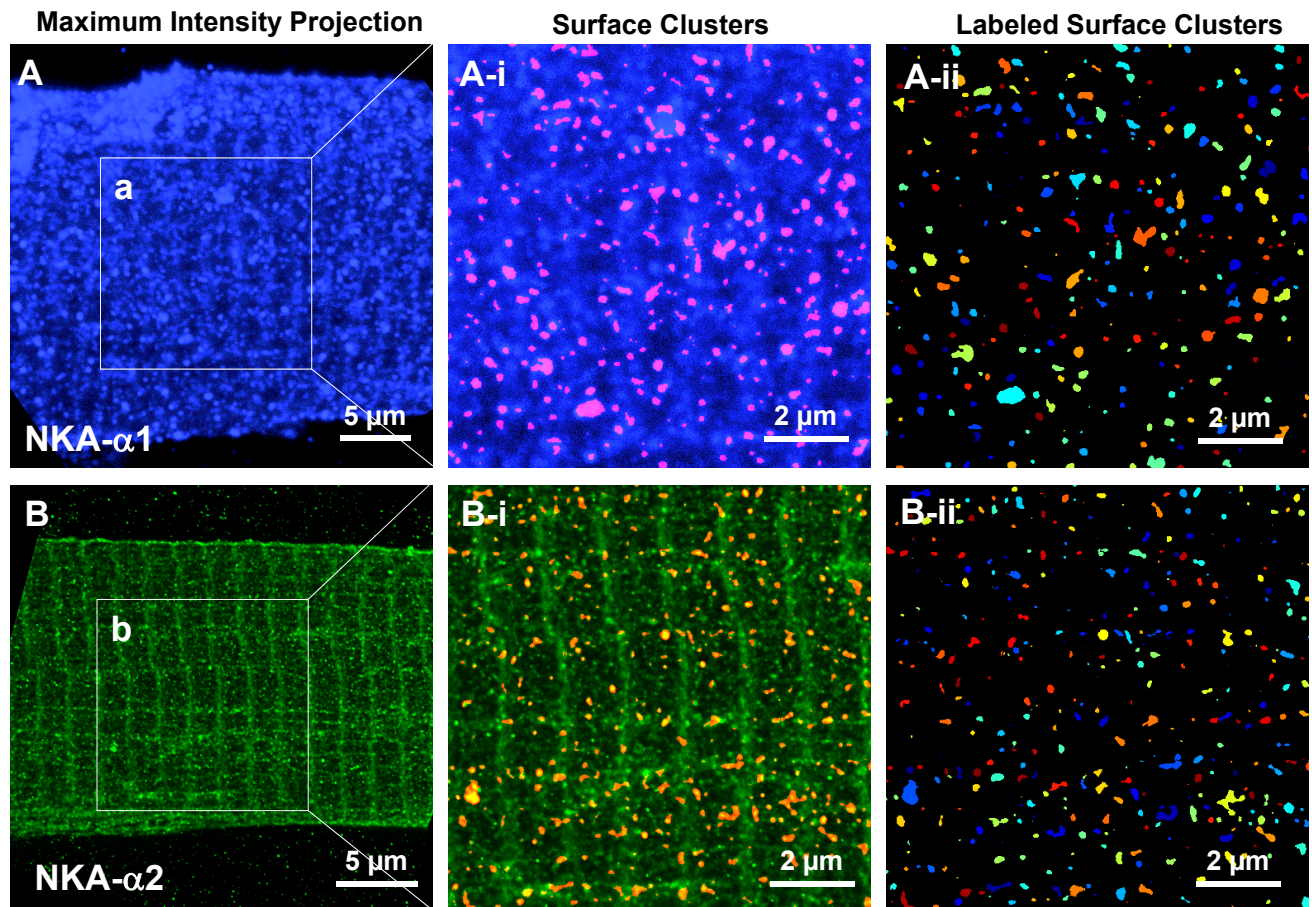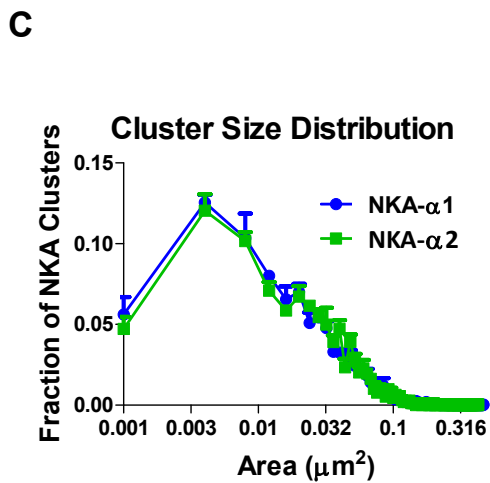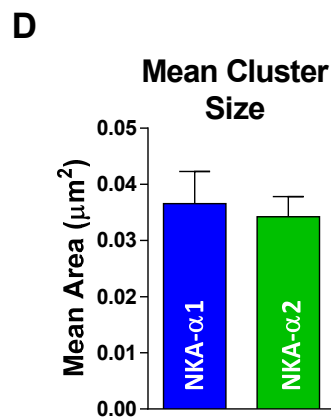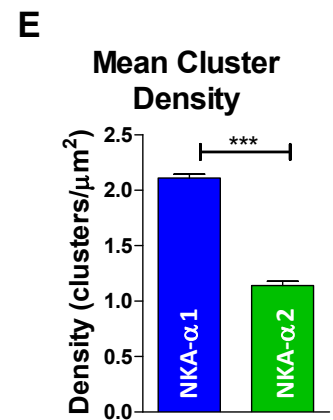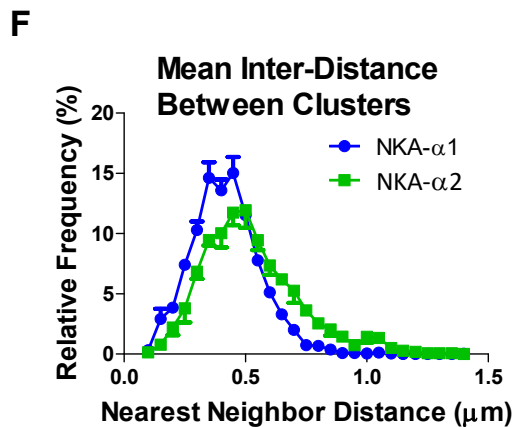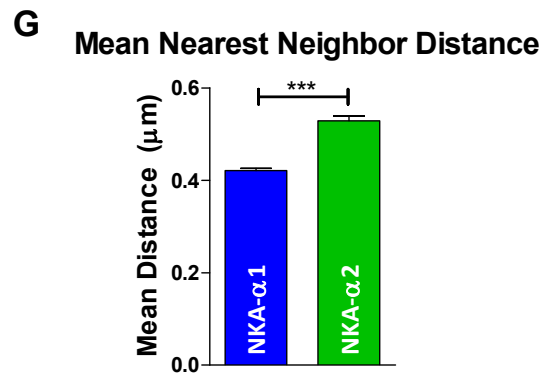

**Figure 2**



**Figure 3. Distribution of T-Tubular NKA isoforms**

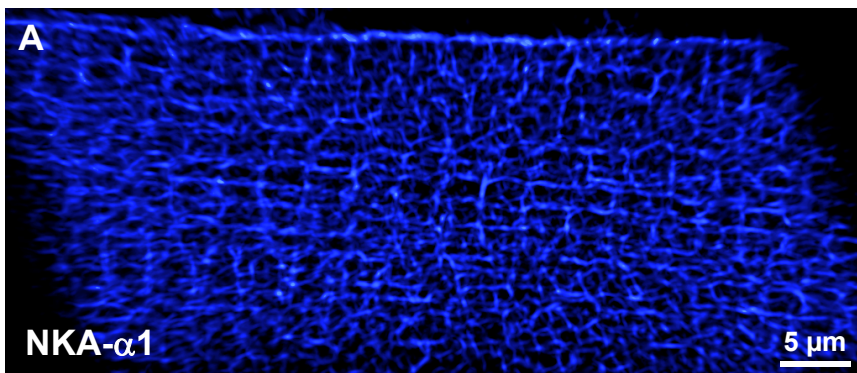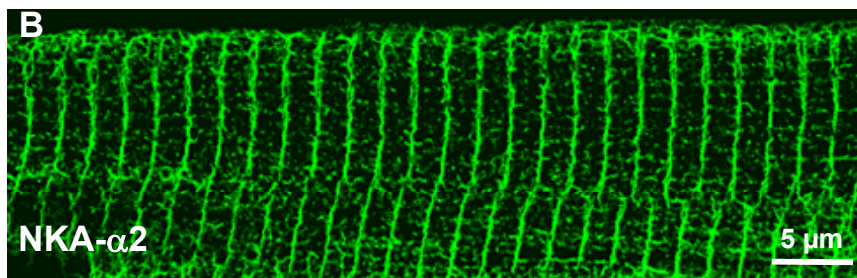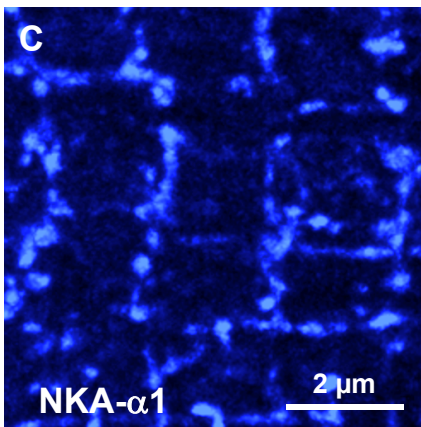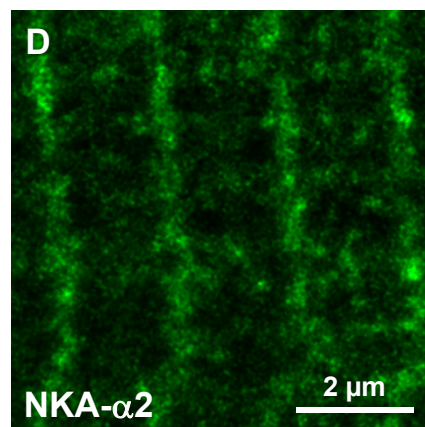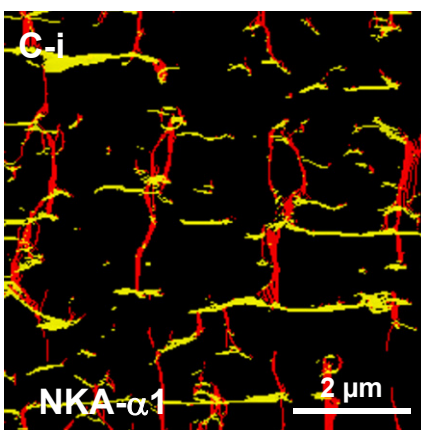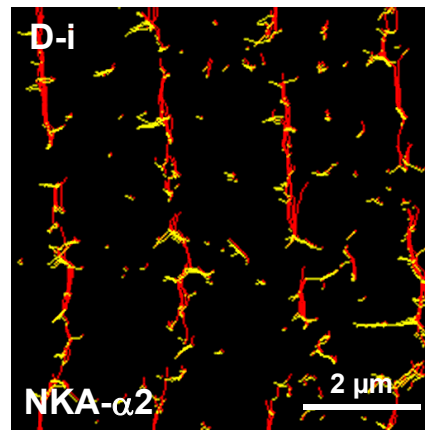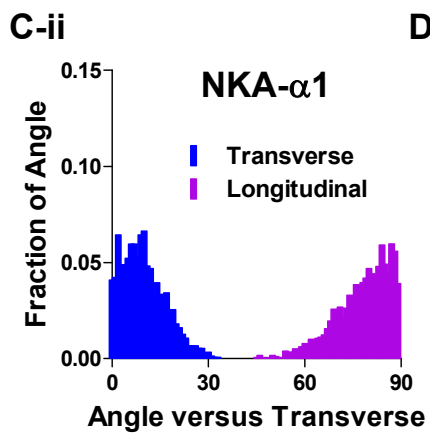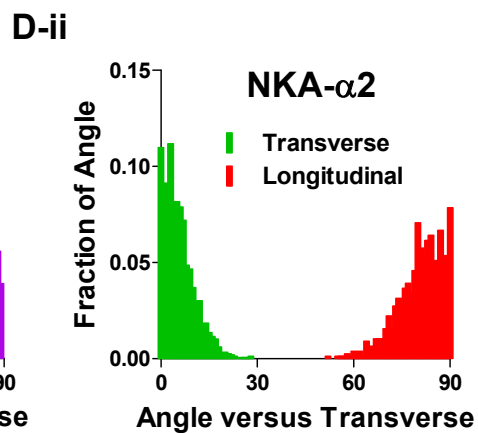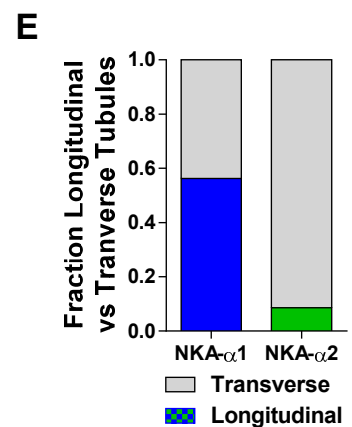

Figure 4. NKA isoform transverse profiles

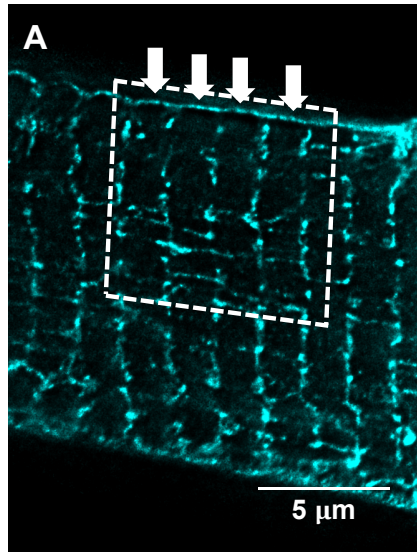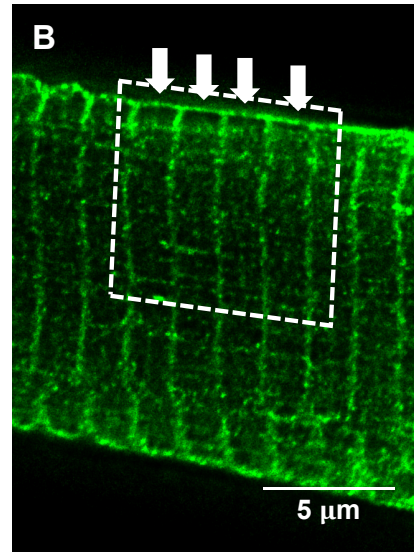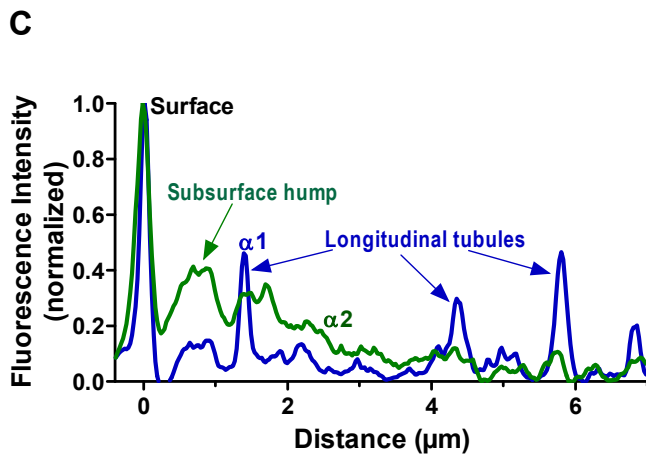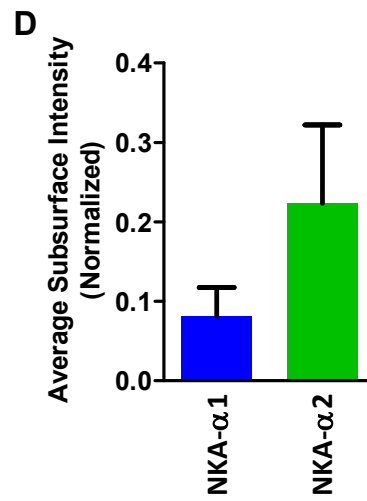

**Figure 5. Distribution of NKA isoforms at subsurface**

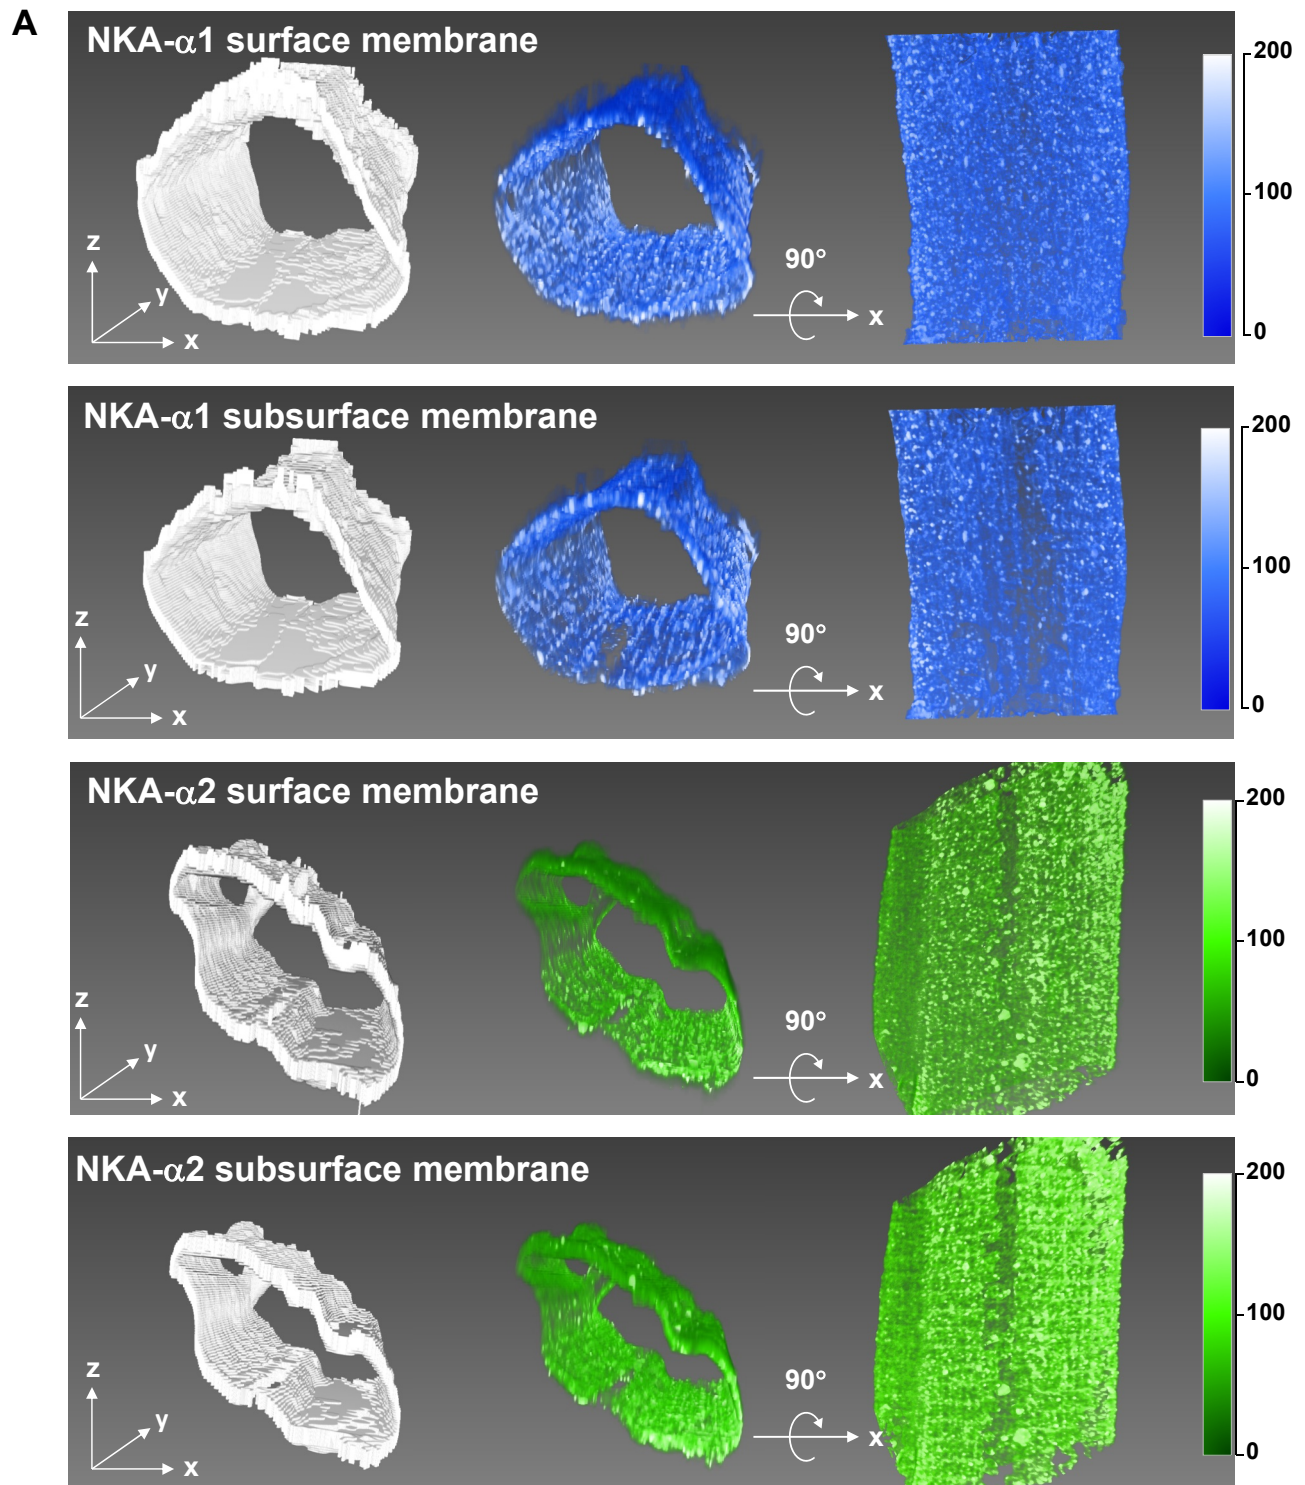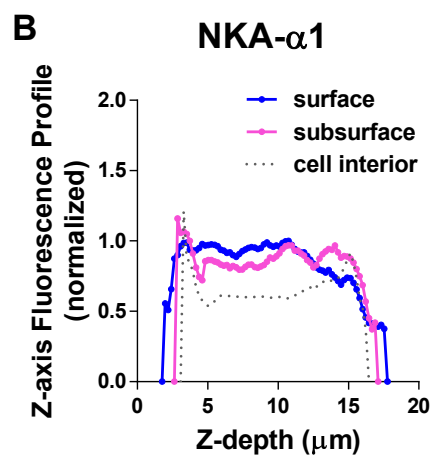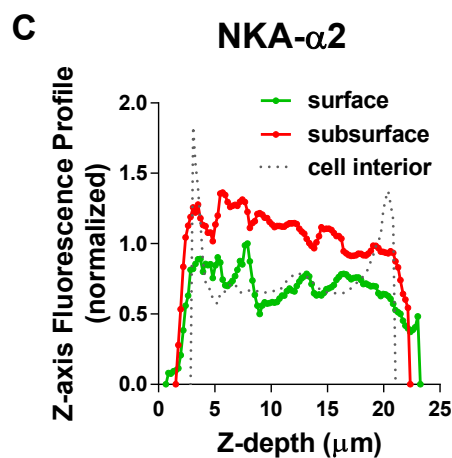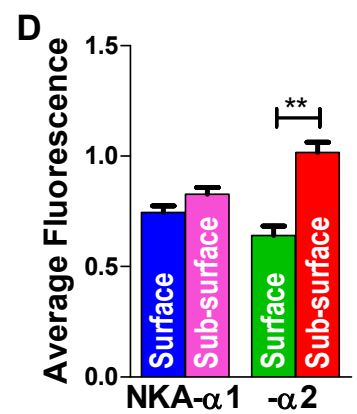

Figure 6. NKA and RyR2 STORM vs. confocal images

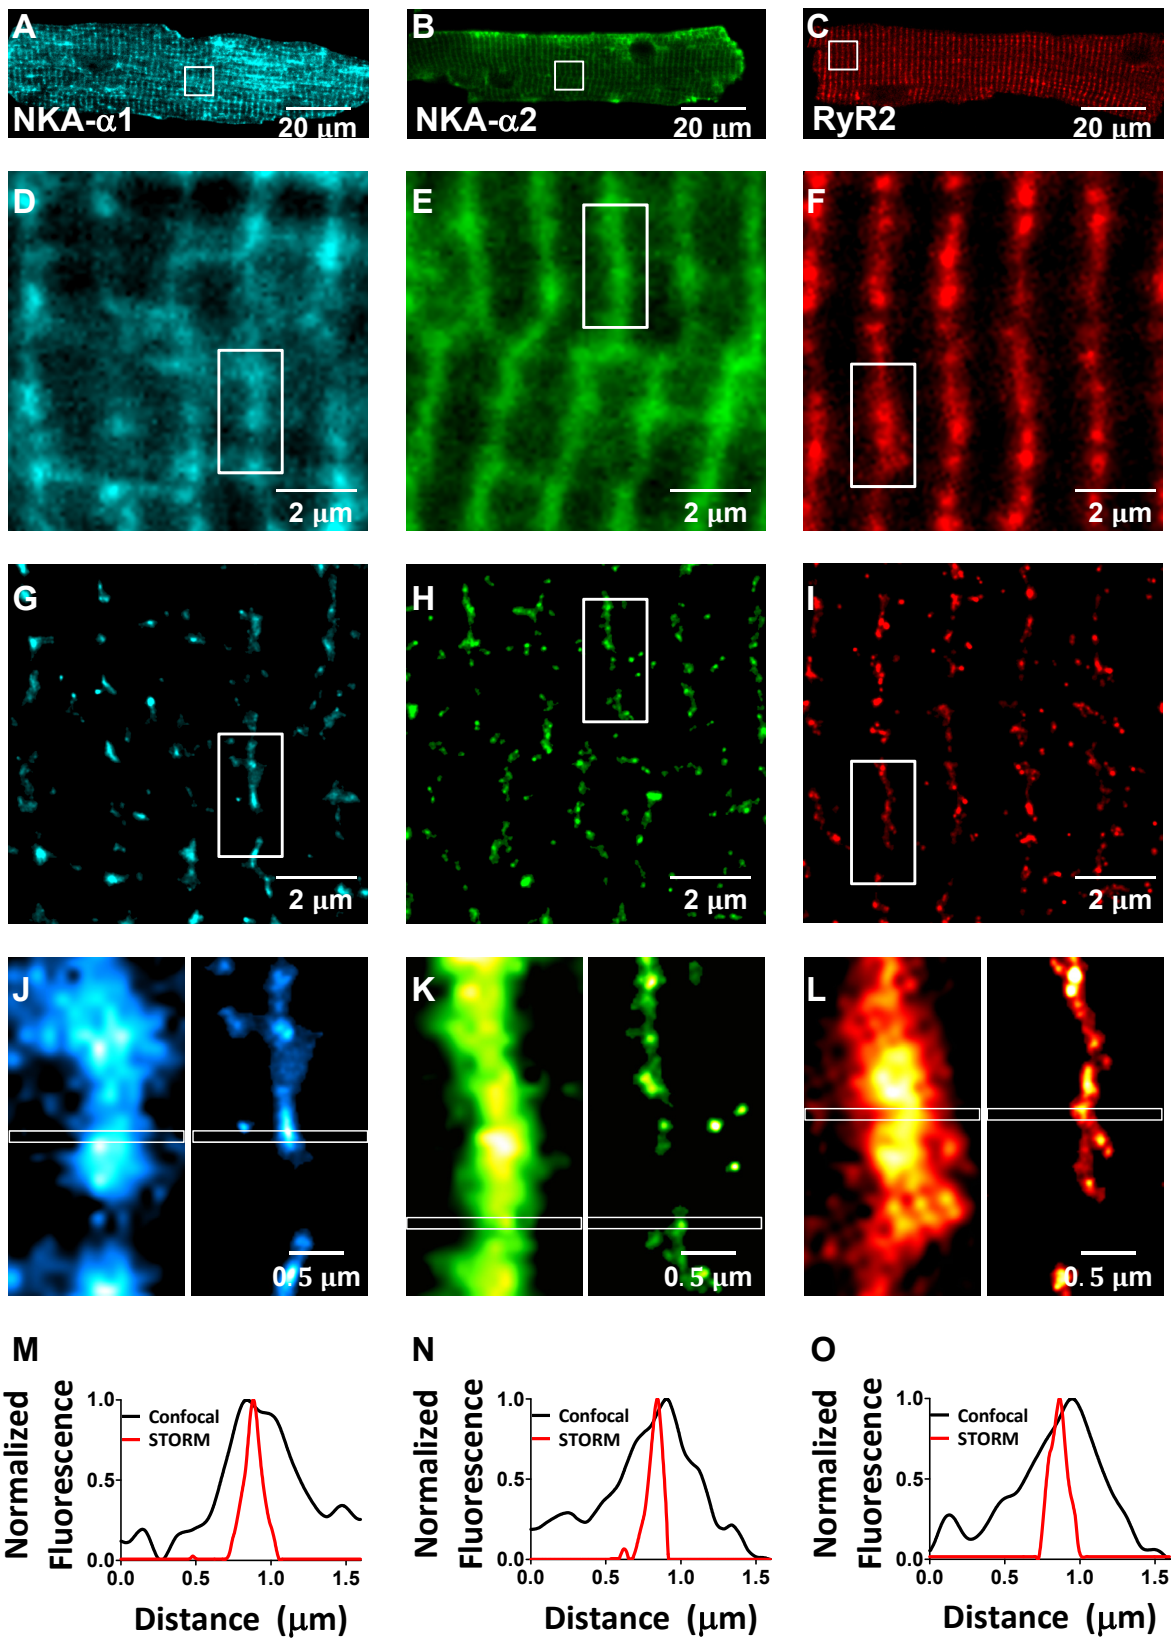

Figure 7. STORM cluster identification and statistics

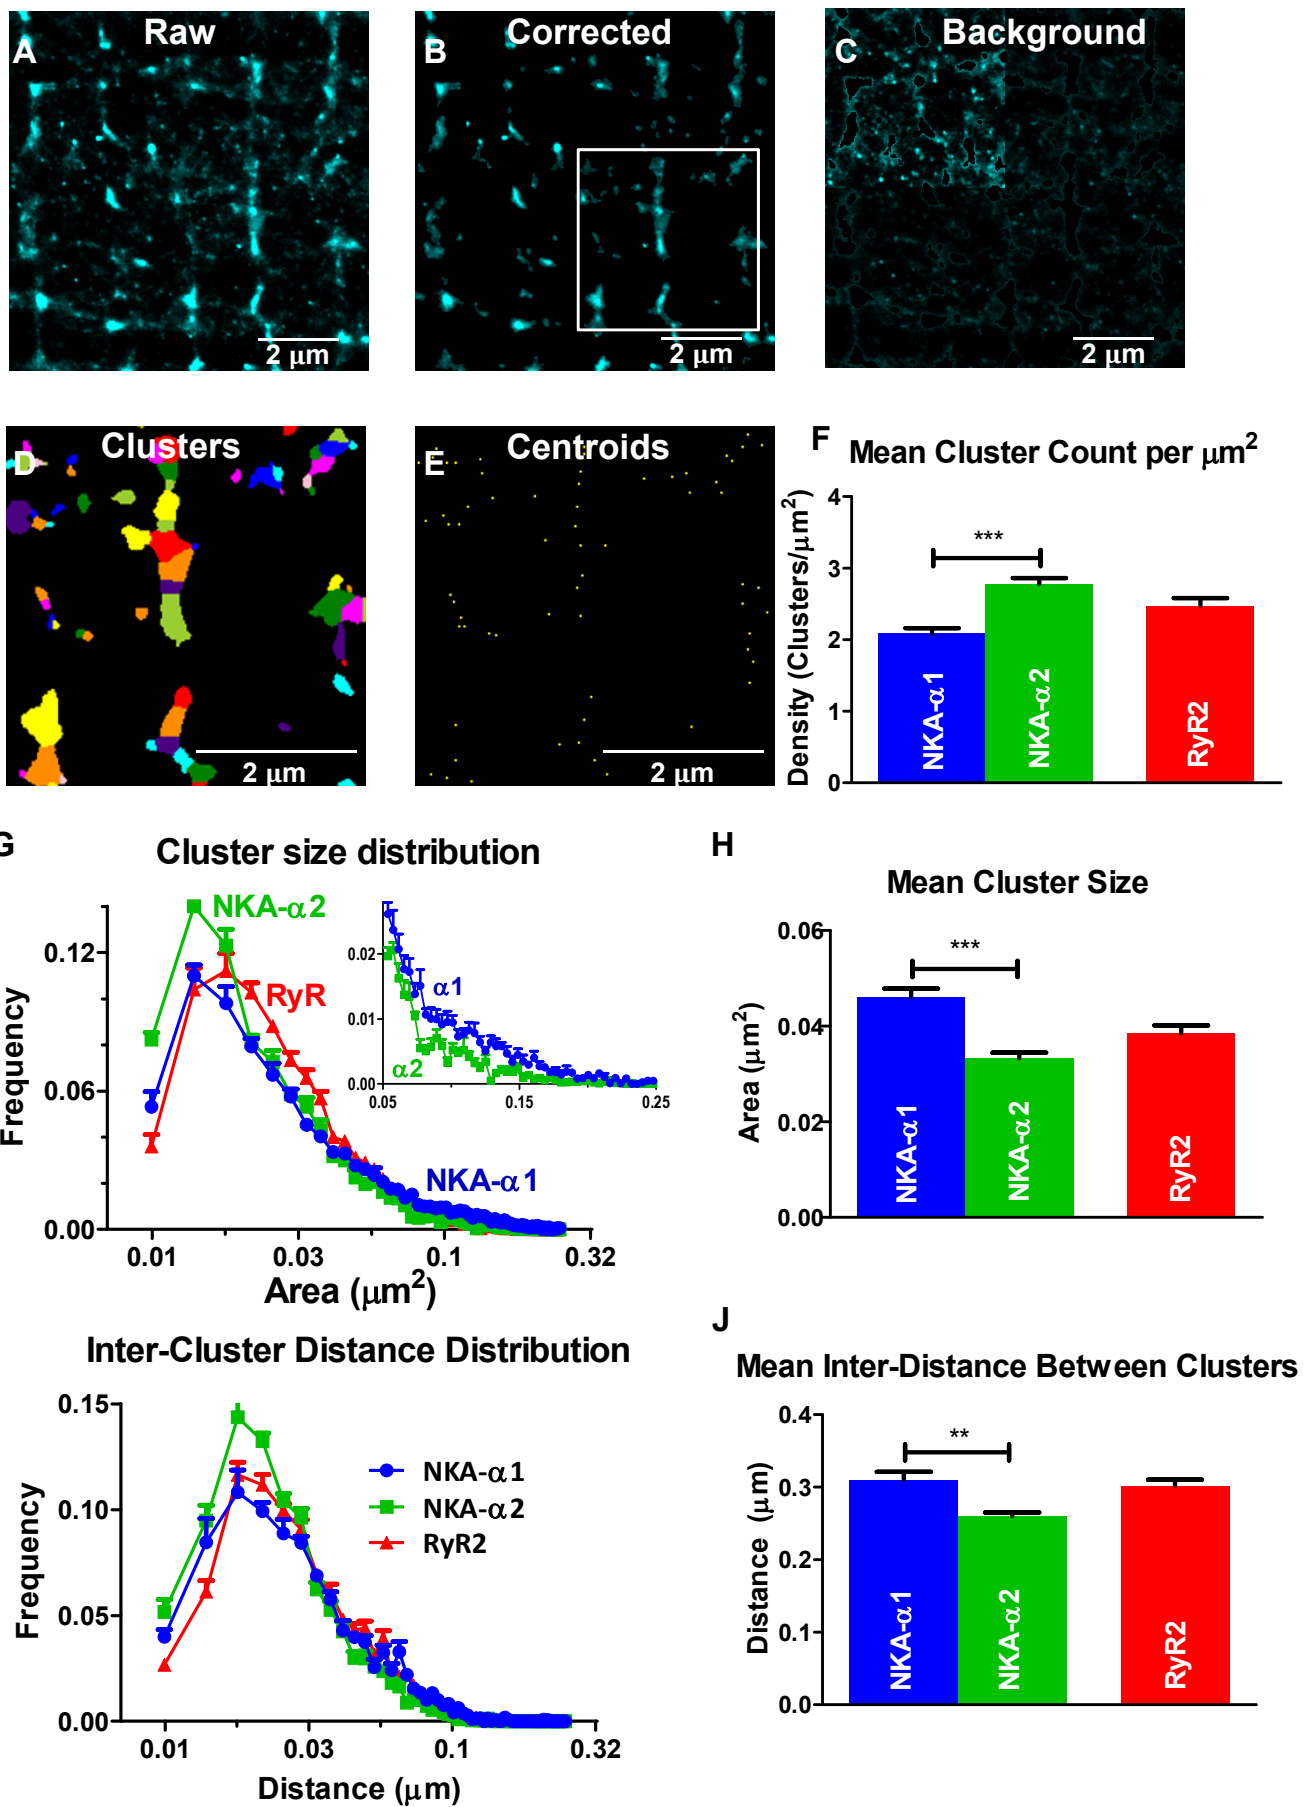

Figure 8. T-Tubular NKA isoform localization near RyR2

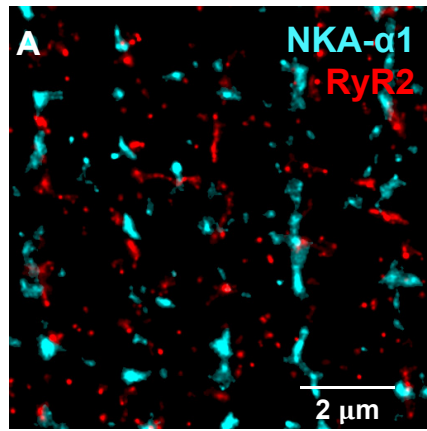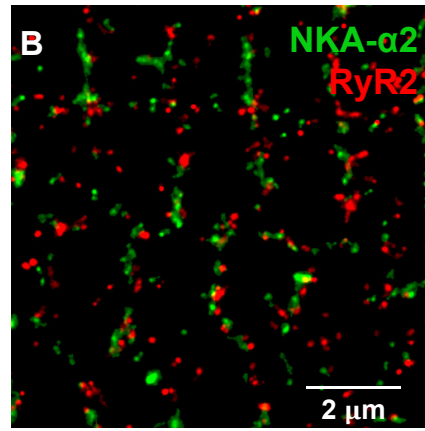

**C** Centroids within 200 nM of RyR2

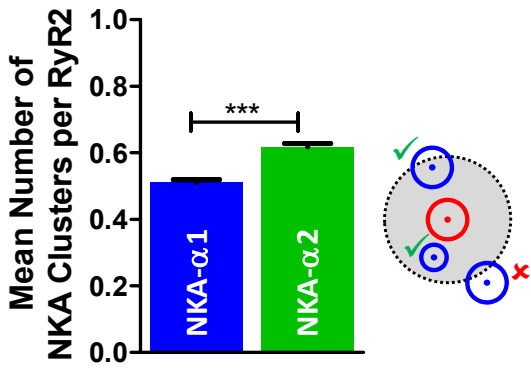

**D** Size for Centroid clusters near RyR2

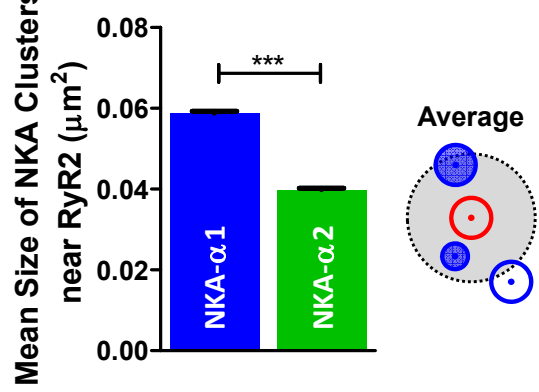

**E** Centroid distance to RyR2

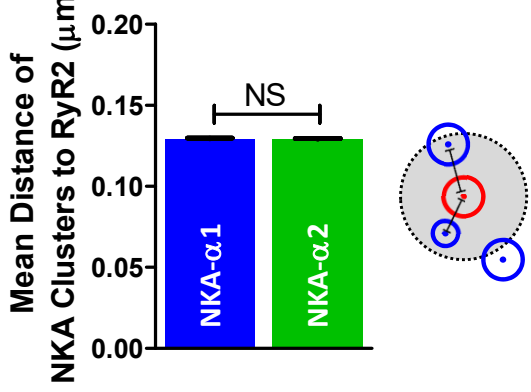

**F** % Area Occupied by NKA Isoform within 0.2 mm of RyR2 centroids

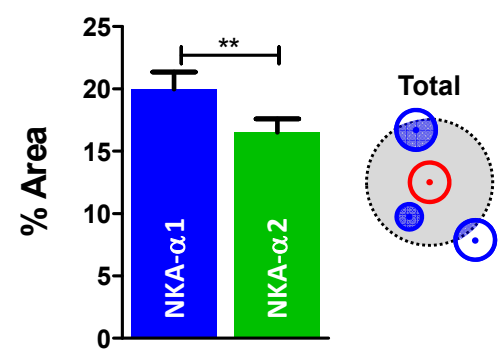

Figure 9. NKA isoform distribution in mouse ventricular myocytes

A. Localization of NKA Isoforms

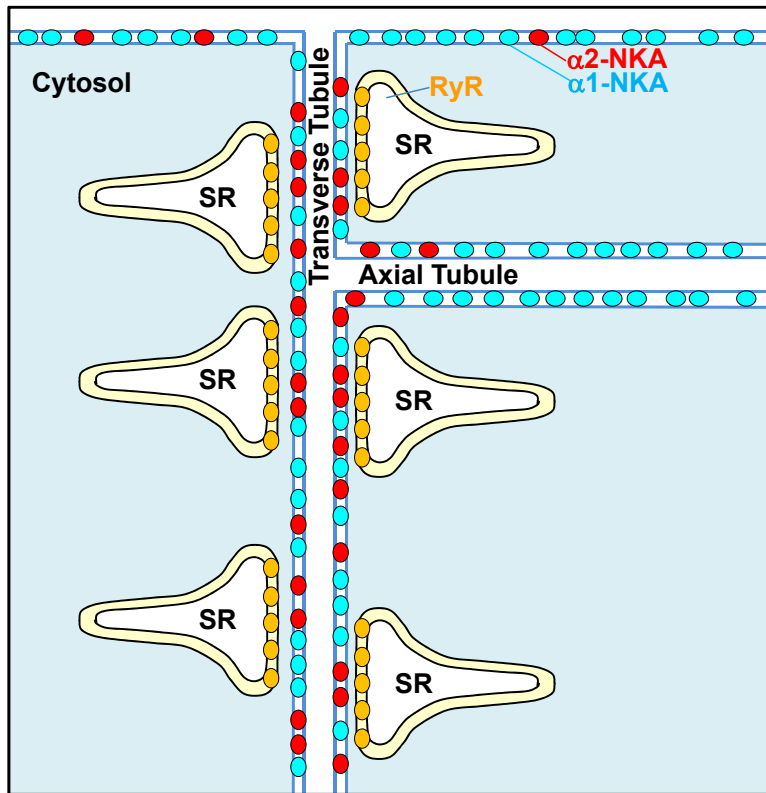

B. Block of NKA- $\alpha 2$

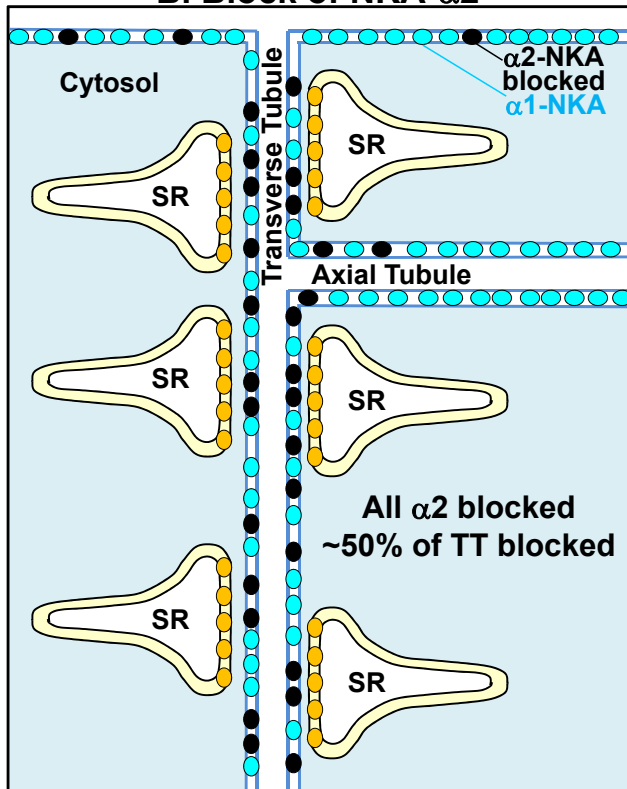

C. Block of 33% NKA- $\alpha 1$

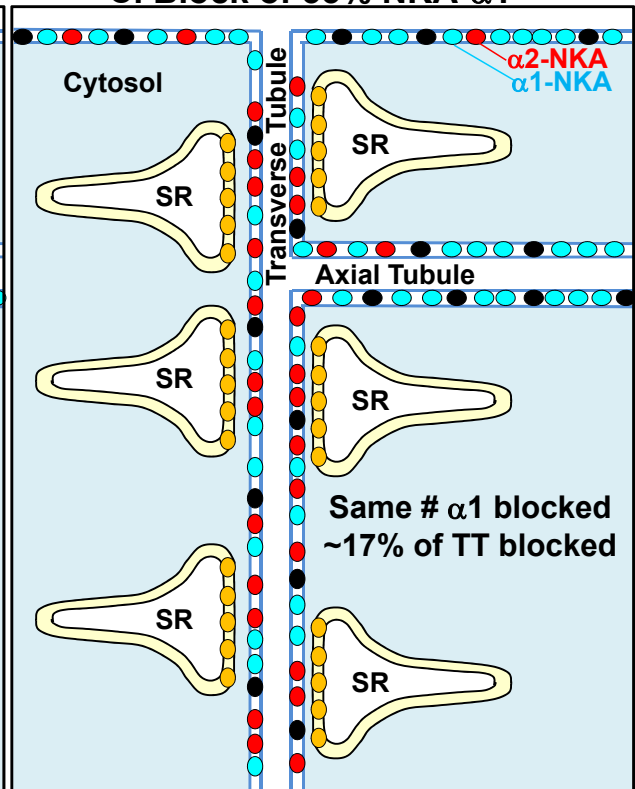

**A**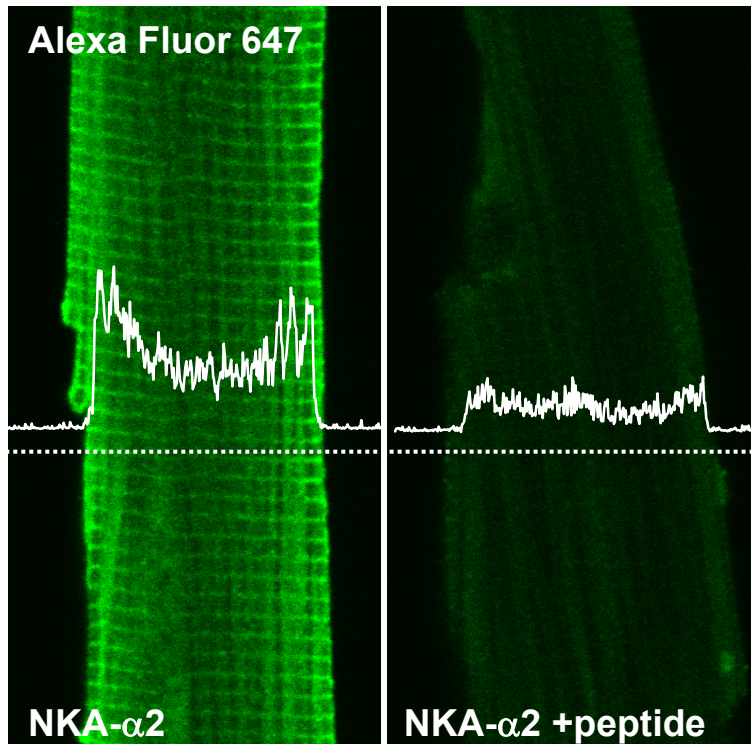**B**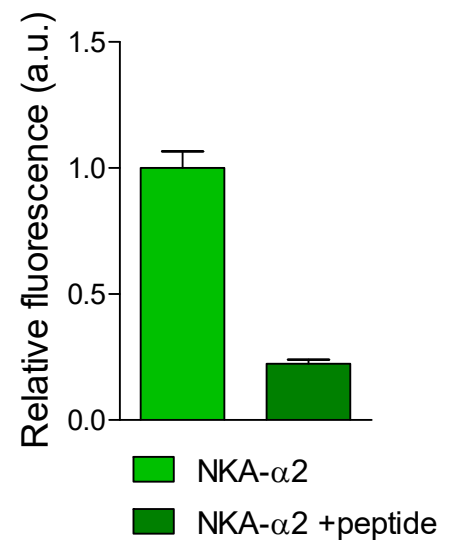**C**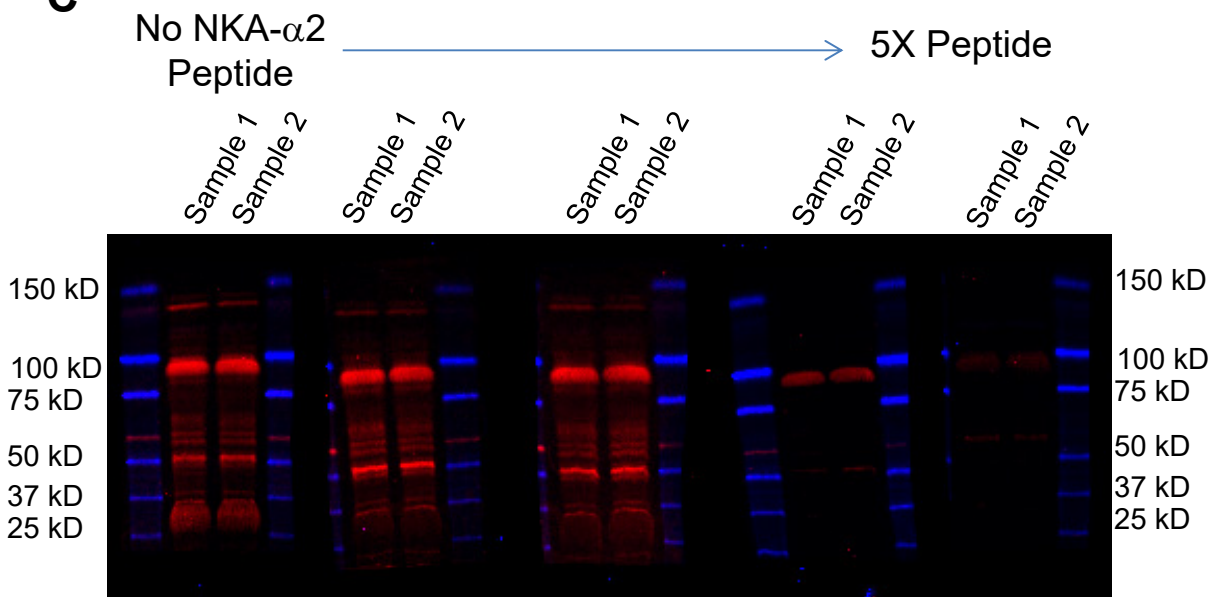

**Supplemental Figure 1: NKA- $\alpha$ 2 antibody validation.** Confocal images of myocytes stained with NKA- $\alpha$ 2 antibody (A, left) and NKA- $\alpha$ 2 quenched with 5 $\times$  NKA- $\alpha$ 2 antibody epitope peptide (A, right). Peptide sequence is CKAGQENISVSKRDT. NKA- $\alpha$ 2 antibody epitope peptide successfully quenched NKA- $\alpha$ 2 antibody and prevented NKA- $\alpha$ 2 antibody staining. Fluorescence intensity profiles were reduced by 80%, with remaining signal likely due to cellular autofluorescence (B). This indicates the NKA- $\alpha$ 2 antibody is specific to NKA- $\alpha$ 2 protein. Western blot analysis shows significant reduction in NKA- $\alpha$ 2 signal (molecular weight  $\sim$ 100 kD) as NKA- $\alpha$ 2 antibody is treated with increasing concentrations of antibody epitope peptide (C). 5 $\times$  peptide quench shows nearly complete abrogation of fluorescent signal.



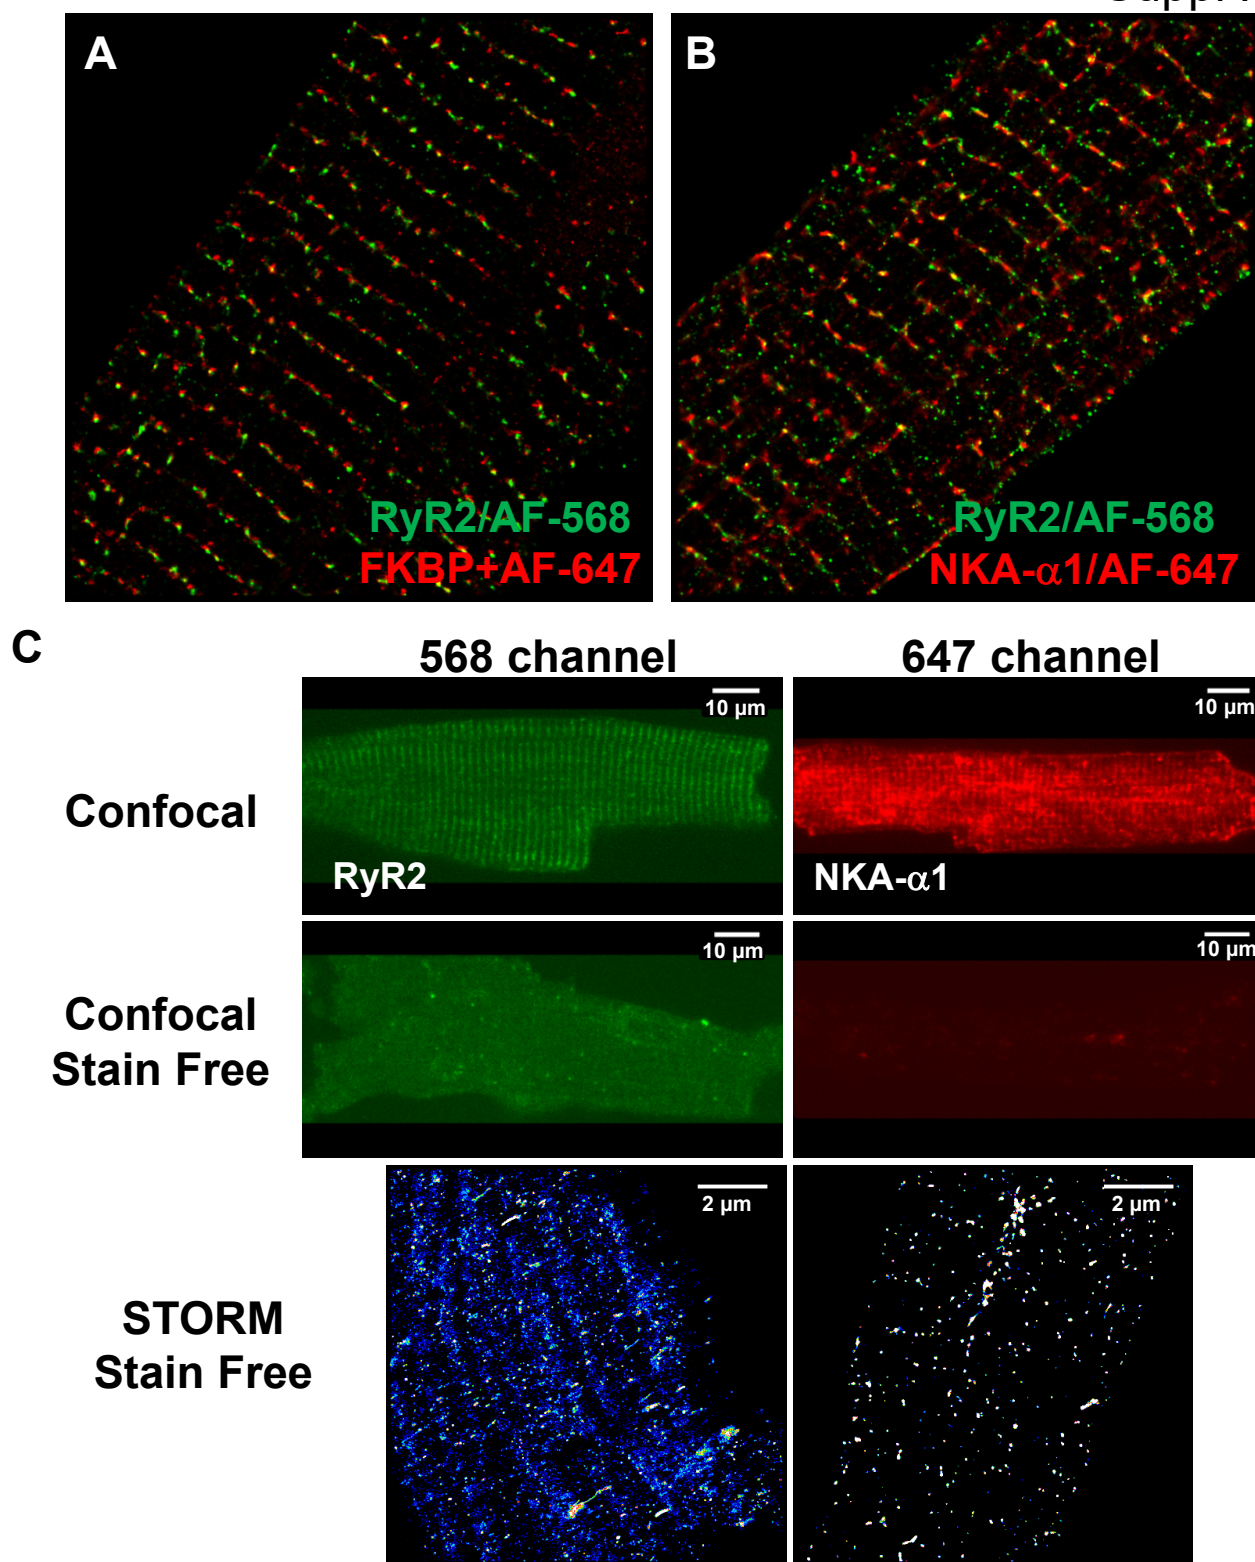

### Supplemental Figure 2: STORM imaging controls

Myocytes co-stained for RyR2 (Alexa Fluor 568) and FKBP12.6 (Alexa Fluor 647) show high co-localization at T-Tubules as the majority of signal from both channels are concentrated together and little signal is independent from one another (A). FKBP12.6 is a RyR2 binding of high affinity ( $K_d < 1$  nM). Conversely, staining for NKA- $\alpha$ 1 (Alexa Fluor 647) exist closely associated with RyR2 in many places but also exists independent of RyR2 in some regions (B). This indicates little secondary antibody specific aberrations in our STORM imaging. STORM imaging without primary antibody show little and non-specific cluster organization (C). Myocytes imaged at 568 nm (left) and 647 nm (right) show little confocal staining and clusters that appear during reconstruction are due to autofluorescence and back-ground. The majority of these clusters are removed during size and intensity thresholding.

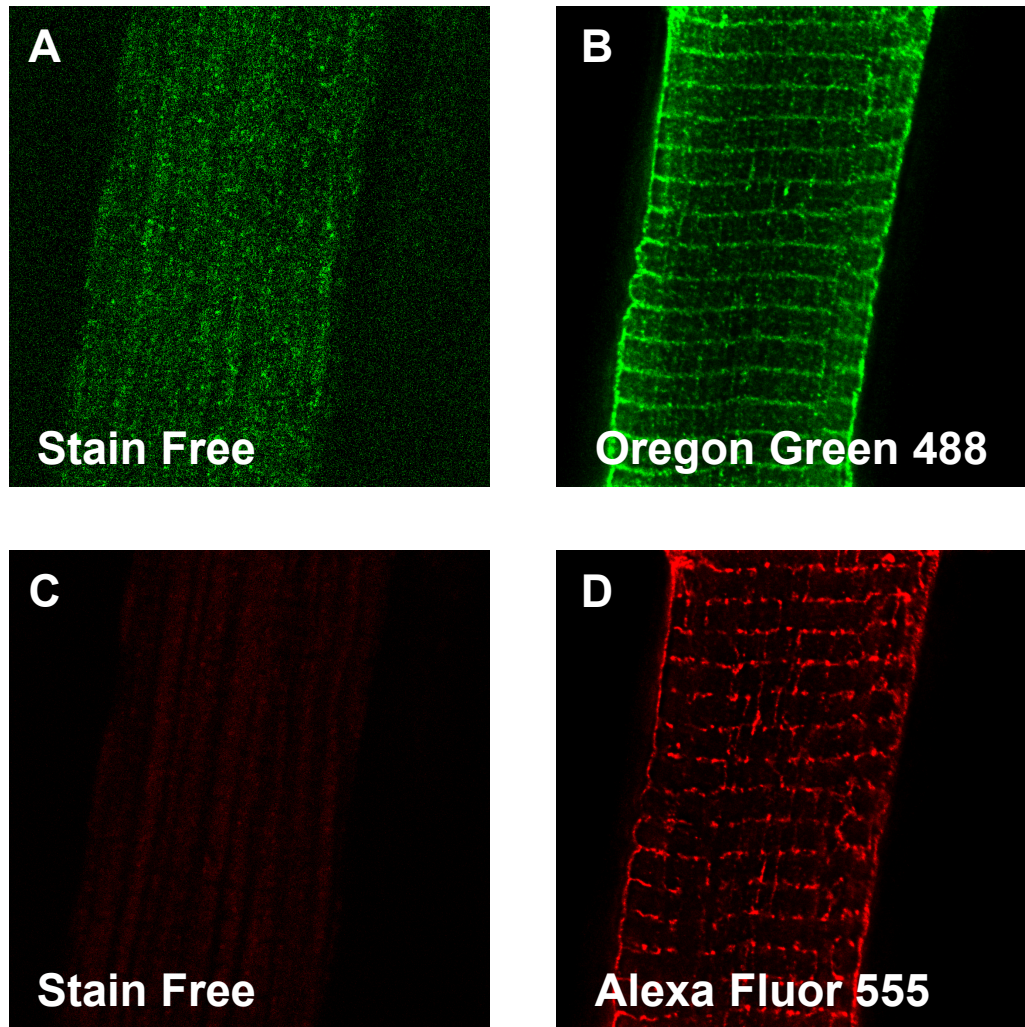**Supplemental Figure 3: STED autofluorescence validation**

STED images with and without primary antibody to assess autofluorescence level in 488 nm (A, B) and 555 nm channels (C, D). Unstained myocytes show minimal fluorescent at 488 nm (A) vs. myocytes stained with NKA- $\alpha$ 2 conjugated with Oregon Green 488 (B). Likewise, unstained myocytes showed minimal fluorescent at 555 nm (C) vs. myocytes stained with NKA- $\alpha$ 1 Alexa Fluor 555 (D). Autofluorescent signals do not show any NKA specific localization patterning.

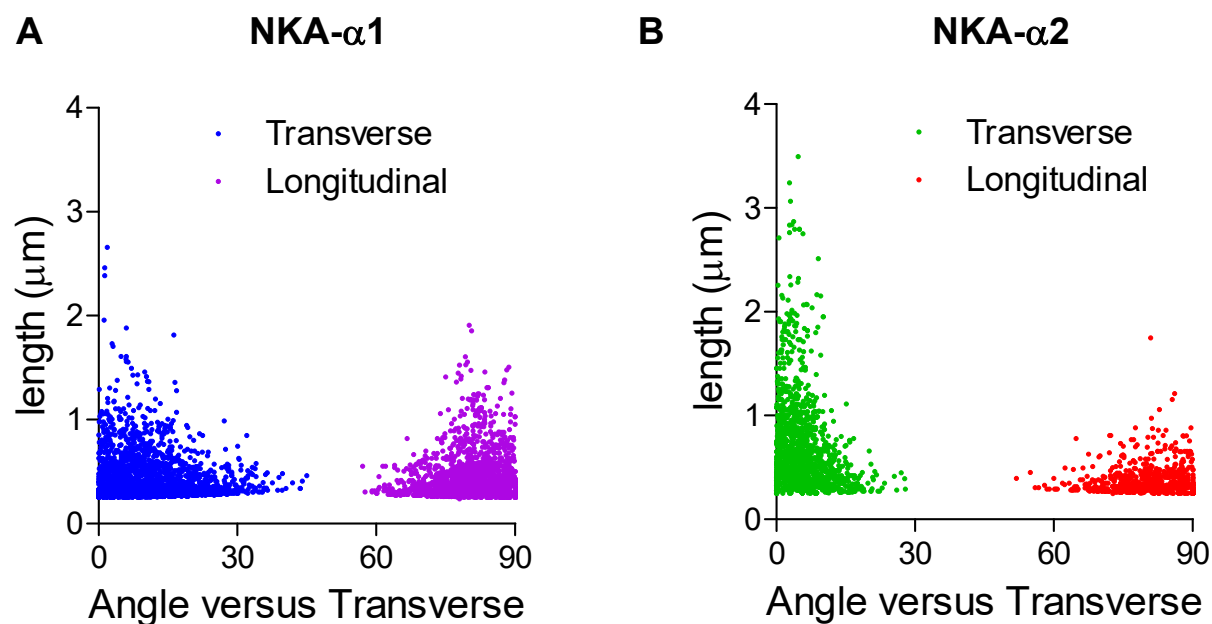

**Supplemental Figure 4: Length and orientation of T-Tubular NKA isoforms**

Segment lengths scatter plots for the data in Figure 3C-i, 3D-I (presented there as histogram of fraction of overall segments at each angle). Orientation angle of each segment was measured for lengths  $>250$  nm (typical distance between nearest neighbor cluster). Transverse ( $\theta=0^\circ$ ) respectively for NKA- $\alpha$ 1 (A) and  $\alpha$ 2 (B).

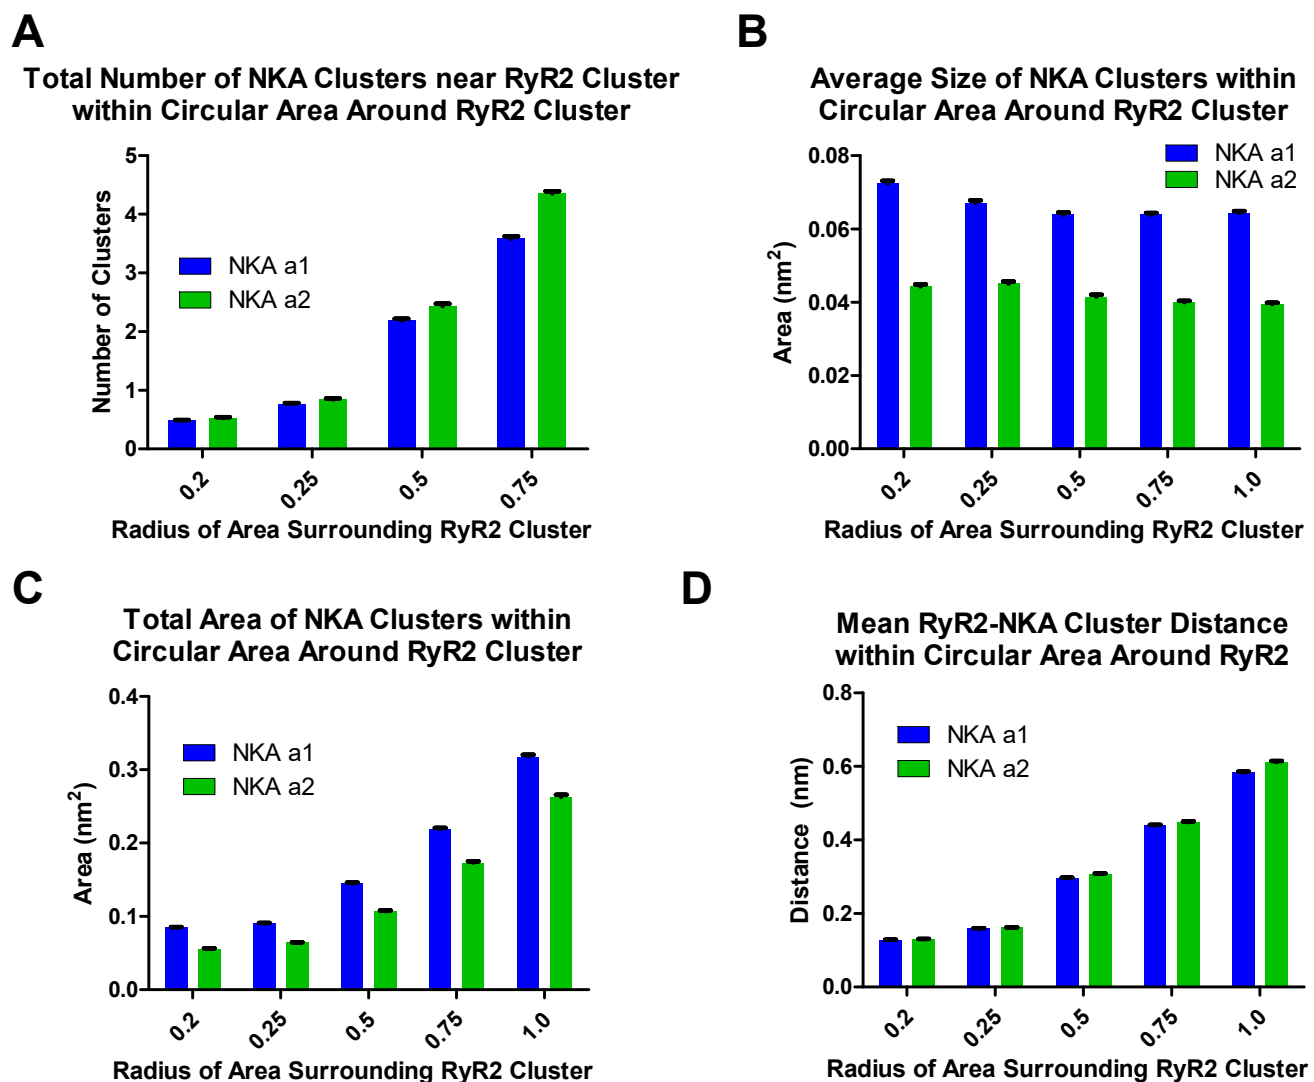

### Supplemental Figure 5: STORM cluster analysis at additional radii

Additional STORM analysis of NKA isoforms near RyR2, like that in Figure 8C-F, but including additional radial distances from the RyR2 centroids (0.2-1  $\mu\text{m}$ ). The  $\alpha 2$  values relative to  $\alpha 1$  values were similar at all distances, indicating that the STORM cluster analysis is not dependent on the size of the area surrounding RyR2 clusters from which NKA clusters are analyzed.
